# Supplementary material for: Identification and validation of a novel overall survival prediction model for immune-related genes in bone metastases of prostate cancer
Source: Aging (Albany NY). 2023 Jul 25;15(14):7161–86. doi: 10.18632/aging.204900 (PMC10415549; doi:10.18632/aging.204900)
Supplement: Supplementary Table 4 [file aging-15-204900-s004.xlsx]

## Sheet: Supplementary Table 4
Supplementary Table 4. The reference document for the CIBERSORT algorithm.
Gene symbol	B cells naive	B cells memory	Plasma cells	T cells CD8	T cells CD4 naive	T cells CD4 memory resting	T cells CD4 memory activated	T cells follicular helper	T cells regulatory (Tregs)	T cells gamma delta	NK cells resting	NK cells activated	Monocytes	Macrophages M0	Macrophages M1	Macrophages M2	Dendritic cells resting	Dendritic cells activated	Mast cells resting	Mast cells activated	Eosinophils	Neutrophils
ABCB4	555.713	10.7442	7.22582	4.31128	4.60586	7.40644	8.04398	6.46999	7.83308	9.31229	13.6828	4.55671	6.2025	7.95136	27.5577	121.432	114.637	4.87218	4.72799	34.1137	15.0305	14.9069
ABCB9	15.6035	22.0948	653.392	24.2237	35.6715	30.0482	38.4554	17.6048	46.0737	19.7157	21.8637	16.3961	20.3094	56.2519	29.3809	40.3903	123.993	23.3846	53.4668	23.6157	29.7864	33.6791
ACAP1	215.306	321.621	38.6169	1055.61	1790.1	922.153	340.883	1107.8	1995.48	280.076	512.637	387.582	190.879	48.9722	30.9743	23.0552	61.3865	26.4129	104.2	73.6079	696.443	596.026
ACHE	15.1179	16.6488	22.1237	13.4283	27.1877	18.4449	13.4413	14.8055	24.6527	33.6584	16.6537	13.4413	16.3753	13.693	1373.07	48.5858	16.7155	193.16	13.9488	20.5012	40.4149	22.7665
ACP5	605.897	1935.2	1120.1	306.313	744.657	557.82	248.547	711.95	958.916	493.969	340.82	239.277	512.931	13644.2	1062.48	7633.96	13825.1	3989.87	263.498	323.381	860.563	307.143
ADAM28	1943.74	1148.12	324.781	22.6897	40.0617	21.2333	15.2096	24.2814	74.7663	24.3708	193.609	94.4058	58.3112	54.9665	274.64	360.682	37.2917	53.2196	137.854	116.88	546.006	128.686
ADAMDEC1	371.034	318.479	127.967	44.6163	80.9645	47.4335	30.553	68.7379	156.708	231.827	68.2776	48.3992	106.301	4464.26	8524.02	5004.97	164.841	1784.61	730.192	1569.76	175.17	185.506
ADAMTS3	146.196	106.052	74.3392	42.3904	79.2418	57.3859	53.413	35.4111	76.2806	65.268	31.4353	50.8197	54.7971	45.5605	32.3402	33.3514	48.698	44.2269	650.183	406.233	100.736	124.357
ADRB2	486.344	510.081	289.798	899.649	77.154	595.211	142.832	97.1742	217.063	2378.45	1957.54	2360.47	664.884	143.018	787.624	363.185	175.633	82.9117	4628.68	2887.87	1969.03	735.663
AIF1	24.0743	20.3219	21.9696	742.816	718.615	35.1722	39.5088	19.0777	29.367	1086.96	105.735	23.1704	8655.68	1841.27	1611.23	11610.3	3285.64	26.9239	1851.12	1672.63	51.1765	6260.64
AIM2	327.958	4538.99	1429.67	294.485	57.0808	250.3	3311.98	1115.68	315.646	407.593	87.2274	134.496	536.112	181.957	2965.89	148.285	176.962	907.04	93.4714	62.1255	117.508	794.215
ALOX15	12.2336	13.7532	9.07351	9.77497	18.5566	12.0097	5.23954	13.1523	22.3814	14.4528	30.1769	9.77632	9.80086	6.62123	5.41222	430.335	2907.33	30.3423	11.1395	10.6549	355.252	30.0685
ALOX5	1799.68	2425.68	190.331	78.6844	74.9309	132.01	59.0874	35.0009	143.013	441.556	157.037	121.998	1979.3	788.54	83.3009	248.372	118.483	73.106	641.14	590.926	1460.76	2917.27
AMPD1	263.745	217.762	3012.77	66.1075	68.6619	85.3184	68.4614	53.9551	79.2642	114.05	59.1404	60.6769	98.2326	76.5446	62.3976	59.9527	89.211	60.6435	56.2086	75.4411	118.498	173.777
ANGPT4	23.1222	21.3126	230.681	44.6847	22.0601	44.4751	99.594	101.446	29.4651	29.2586	9.38076	26.1766	16.9187	39.3326	21.2181	11.8097	17.8943	12.0187	33.4114	31.3296	14.8123	34.7187
ANKRD55	284.413	218.916	117.2	141.698	1853.34	436.42	79.775	1077.33	123.881	176.244	83.3853	88.4596	126.108	123.6	96.2039	48.5542	108.027	133.56	153.229	104.301	1068.3	415.243
APOBEC3A	102.429	89.6007	99.594	64.3553	107.236	52.7372	57.7823	71.3779	36.3901	723.144	253.307	132.219	2415.2	85.2401	4501.14	148.799	107.914	2637.28	71.9208	33.3549	1137.48	5584.33
APOBEC3G	1283.45	1135.29	2034.56	2090.85	336.646	2340.67	1540.77	386.054	979.72	5415.05	6314.77	8895.3	865.741	278.768	1036.99	258.3	203.448	1393.36	627.131	327.194	306.306	464.441
APOL3	222.628	530.398	754.868	1209.12	950.79	1615.03	1119.49	351.129	993.462	1173.27	1172.69	1002.84	1000.83	238.598	11009.3	437.527	219.6	861.459	264.676	98.2161	107.805	106.425
APOL6	17.3118	11.6065	7.83161	8.44897	11.9623	8.43938	57.5172	7.17759	13.3676	9.71819	12.8553	370.397	11.8207	13.1094	967.645	7.78461	9.13554	159.535	23.1299	8.19543	5.95213	19.0712
AQP9	21.3428	15.1146	15.6643	13.6755	14.1921	14.8941	13.116	18.6667	64.2641	188.873	93.4693	12.5778	2044.03	4583.5	4309.34	399.475	1132.65	1454.9	576.553	1876.27	128.82	13705.7
ARHGAP22	34.6356	48.3129	23.8335	45.0141	71.8606	22.6312	15.4527	25.4097	32.5678	12.4946	82.4275	27.3986	54.808	175.457	351.592	272.989	319.774	2985.73	46.7478	52.5455	81.6401	20.4104
ARRB1	15.9312	15.1982	18.9925	19.0913	18.7122	25.1842	23.0552	18.4449	7.89658	15.1143	57.3967	138.989	440.237	333.396	946.014	395.556	43.1076	32.6645	44.4661	31.2903	26.0742	32.7496
ASGR1	40.8701	42.4978	42.6129	12.1888	10.8262	13.2742	8.19555	5.12217	19.5566	304.793	10.8239	15.2478	976.707	108.722	25.2363	155.491	76.1762	33.7186	55.017	65.876	40.3944	75.0727
ASGR2	30.261	33.9085	33.9136	29.7802	36.8714	41.8225	34.4638	31.3827	113.23	167.104	29.554	29.8746	1484.96	36.1198	26.3739	760.726	48.7591	23.4962	23.9863	20.5297	51.182	49.9026
ATHL1	367.96	535.783	782.068	806.1	5333.94	794.948	231.179	1765.55	250.515	216.982	570.547	277.085	183.281	52.2582	167.503	132.632	31.1235	26.361	72.3494	60.4893	329.502	1241.01
ATP8B4	123.615	86.8059	83.7257	69.7936	59.8893	51.0142	77.3483	29.0534	58.6311	106.472	612.758	1035.86	219.344	106.071	33.3514	1163.25	641.208	109.357	1798.04	2105.05	386.195	95.6969
ATXN8OS	19.0349	17.5815	131.452	12.1085	11.6108	12.6599	12.9884	12.4236	16.7814	24.8867	10.3469	9.39832	10.4154	10.9988	13.344	11.4028	10.3486	12.3733	22.2085	8.57138	19.4385	15.5601
AZU1	26.0845	37.3159	54.5057	75.4942	9.99668	45.1416	20.3036	12.1019	11.8113	32.5905	411.645	118.871	96.5045	51.6017	163.901	315.833	63.6678	58.9848	600.003	1034.59	114.3	82.3713
BACH2	4442.15	1237.16	145.925	716.576	1423.66	449.179	442.476	245.058	444.685	597.151	478.099	511.12	52.1092	60.7307	78.3338	56.2809	58.8643	82.8144	78.9469	68.3001	187.935	132.765
BANK1	7633.96	9177.36	108.775	27.0887	39.5645	35.5128	4.92986	18.9925	33.4653	55.7594	33.0048	37.1949	86.5872	7.01418	16.0203	29.1926	49.2294	19.4114	79.8155	92.5394	993.031	39.1851
BARX2	16.2562	22.6251	15.0319	14.6807	13.8989	10.8993	17.902	19.7435	400.092	134.587	19.0244	26.1019	18.1562	17.1419	15.5661	28.0728	22.6502	21.7593	48.1766	26.3322	65.6124	61.5585
BCL11B	166.581	133.714	149.821	4183.74	7177.23	4962.94	842.214	3186.54	2748.11	2581.69	818.211	512.276	88.0268	78.0084	68.039	51.0786	95.8182	76.4604	53.8648	52.1582	306.988	166.893
BCL2A1	112.642	314.019	76.3933	575.035	452.914	755.858	1206.51	698.651	171.063	431.975	539.959	526.577	2261.39	5560.46	7038.54	195.96	135.592	5551.25	869.147	3291.23	13257.9	8790.33
BCL7A	1097.31	437.915	201.809	119.268	118.184	78.5216	52.2568	70.5382	182.583	53.793	31.5017	60.2289	53.3365	55.798	131.354	185.738	281.322	211.805	156.316	190.531	79.7457	121.286
BEND5	571.201	267.741	197.855	159.675	219.568	64.9846	51.4661	54.2462	28.0224	56.1774	74.6435	37.2195	57.9841	67.0472	57.1138	51.6149	66.0907	79.3369	54.2388	63.1844	82.1673	102.157
BFSP1	8.61552	12.0925	9.8349	19.6636	130.383	8.91036	12.0895	59.3268	14.5326	111.388	34.6145	19.4517	21.3786	15.6821	36.9511	30.8024	19.3963	12.2006	34.0229	49.685	13.218	19.0865
BHLHE41	227.284	379.25	981.107	45.2704	17.6763	26.7059	66.1759	22.2227	114.518	88.6299	51.5342	51.5861	42.8459	5455.34	143.868	325.13	328.116	552.052	257.349	252.502	54.1555	77.6795
BIRC3	1762.32	1072.24	363.816	370.931	677.981	1121.42	2888.71	402.562	2449.37	238.925	283.687	1173.96	159.952	230.765	1971.11	237.502	442.73	10553.6	71.2562	1951.56	1582.23	132.854
BLK	1788.42	3284.24	42.0395	136.394	67.9995	19.1653	10.4213	89.856	9.58007	20.7148	10.0566	12.2576	34.1341	15.5241	11.8205	14.4167	15.2858	16.744	10.557	8.16495	38.7002	9.8636
BMP2K	282.31	216.434	104.853	117.765	109.308	42.0689	146.678	224.313	77.321	118.818	107.043	117.2	350.591	323.587	655.432	971.804	427.676	620.462	2822.78	2472.96	900.238	588.904
BPI	10.4697	14.0317	15.2478	64.1389	41.2995	12.5077	6.38254	15.1958	10.7796	19.4374	837.201	166.062	280.002	15.0218	16.5337	25.9603	13.4825	14.913	973.6	829.761	390.588	60.8005
BRAF	2571.8	974.313	492.069	178.693	101.027	155.551	178.352	102.126	593.323	441.028	298.719	257.18	264.878	312.931	369.771	191.009	230.095	360.063	153.481	301.844	925.522	721.28
BRSK2	10.4459	4.45687	34.3224	10.4622	7.92416	16.1904	40.5037	54.7305	14.7642	61.6161	18.2703	17.2201	11.7586	9.84857	10.5262	8.88663	7.49855	28.81	46.236	15.4819	8.2523	11.8617
BST1	65.2184	67.5879	33.7686	68.8556	129.37	67.6999	71.8232	62.2914	44.3033	322.461	151.41	86.1371	1567.22	390.539	73.7683	209.465	154.277	113.982	427.5	444.168	10.1611	1750.23
BTNL8	15.2224	13.2676	9.87055	13.4955	23.1704	17.4691	21.2181	16.6432	35.1461	44.0867	11.5487	13.7168	20.1092	25.7234	18.6394	10.7103	16.4447	18.9824	13.13	16.6824	99.5827	1062.58
C11orf80	531.849	393.772	2192.71	162.585	91.4854	158.515	138.989	136.962	92.0347	149.347	100.49	141.009	85.6724	99.3344	34.4887	88.3406	103.765	141.865	147.602	142.9	157.069	101.659
C1orf54	41.7108	44.3095	113.097	244.03	292.562	288.264	109.841	87.1984	51.3178	125.682	162.659	73.1089	395.023	1418	1157.75	2036.48	4773.9	1134.91	277.276	305.211	422.549	49.3094
C3AR1	131.1	97.683	235.873	218.067	100.573	198.343	109.086	110.397	521.296	667.739	753.718	473.171	1337.37	799.645	4247.95	2754.46	879.088	259.278	4587.55	4865.33	9437.29	746.045
C5AR1	92.3923	64.8837	25.3747	71.2981	39.1758	24.5742	23.7999	27.3608	42.3142	422.403	335.175	170.959	4237.56	4990	262.804	1920.67	1195.95	889.958	536.889	756.901	2647.73	12587.2
C5AR2	8.03205	16.6674	15.1059	5.51263	50.3667	6.81844	16.3458	8.18236	46.5934	21.2391	35.455	28.8741	56.8437	41.5458	16.6959	59.0537	24.6139	18.8477	3.57063	40.8696	286.016	383.274
CA8	17.9962	18.5439	16.8672	13.3172	19.5397	16.4218	15.3265	200.624	43.5401	62.3202	14.157	14.4685	14.0091	12.522	31.469	13.2502	11.5131	32.217	72.2169	144.632	15.5076	25.5913
CAMP	32.2498	29.6651	52.1274	76.1451	148.566	101.74	32.6324	121.34	33.0928	40.1862	1655.27	130.334	126.179	187.357	81.6565	105.44	94.8232	41.5286	223.234	175.154	529.456	1507.37
CASP5	16.2288	25.4112	7.48907	20.7219	11.6232	9.07351	7.44133	44.6726	117.851	13.7859	35.1619	57.1513	120.177	50.414	518.076	31.7304	21.4306	52.5225	9.1294	70.3713	59.1973	483.505
CCDC102B	7.52423	6.16562	6.18462	17.72	9.25105	13.3104	1.76176	6.13376	5.82426	17.0872	21.3121	3.26143	5.67486	207.123	1.53837	2.55642	146.683	8.57163	36.9436	6.50272	30.7604	6.41653
CCL1	9.15145	10.4182	10.0572	10.7845	22.584	9.66943	15.9703	12.6165	9.10471	11.2496	11.5334	29.6055	11.1233	12.3097	13.3928	10.2072	10.5037	366.166	7.25932	1266.59	9.88465	9.40769
CCL13	195.351	171.43	101.36	120.948	41.6598	118.403	66.0458	12.7071	75.5113	72.3377	95.0205	96.6664	87.0877	166.932	182.284	6581.43	3717.5	5513.79	101.027	675.87	121.977	105.316
CCL14	70.0172	58.9192	153.552	71.0645	31.2109	91.7696	77.6091	33.0879	152.042	152.988	67.5446	72.9949	105.07	166.02	1233.17	2459.1	283.012	172.673	98.3015	149.323	119.006	248.318
CCL17	42.2162	58.9959	82.1462	78.5043	19.4836	30.3048	170.338	38.0338	393.926	59.7716	75.0118	38.7717	67.7605	114.842	55.4116	620.213	2541.41	6414.91	26.6174	45.9517	91.9287	34.2859
CCL18	19.9388	21.6882	56.6092	35.3176	24.3512	12.8258	81.2024	31.2767	20.5683	109.495	39.1384	79.5132	40.6813	2820.02	1252.53	12334.4	1697.96	1749.79	423.11	930.782	47.8195	49.5288
CCL19	78.5216	139.744	258.102	77.623	36.8714	60.9292	89.7783	48.9856	34.9934	21.1785	109.923	146.46	115.553	114.367	32553.9	137.074	170.847	3048.87	38.0487	19.1524	152.801	117.264
CCL20	39.5088	26.9925	13.7168	61.5411	13.082	29.4014	1562.14	188.676	12.3693	18.1303	18.4352	20.3182	18.8511	11.3105	724.615	12.805	14.5209	1509.78	13.9653	5473.44	31.129	22.4447
CCL22	46.0713	31.3251	19.8475	24.0353	39.4296	27.8785	28.1703	24.3331	560.184	23.0223	26.9168	76.9656	33.1173	2604.47	464.973	880.202	4123.09	30950.3	24.5231	113.921	94.5215	59.9268
CCL23	19.7435	16.5925	53.413	15.3184	19.6982	27.6569	5.97155	13.4413	70.6599	22.991	64.6157	43.8821	37.9861	244.479	615.574	5505.22	321.781	377.54	662.699	545.135	534.198	58.6897
CCL4	1661.46	817.482	307.807	2564.29	270.872	442.476	11191.4	356.473	481.279	8310.15	11202.8	38944	3000.89	1968.54	11885.1	3139.01	2072.16	4282.93	1133.5	35339.7	6568.92	2680.05
CCL5	19.5685	88.2396	30.3254	11434.9	189.493	3143.97	1850.01	69.7584	171.001	19080.9	17238.7	11744.5	102.843	100.234	16862.2	250.75	59.2935	6507.21	46.1915	660.091	300.438	133.363
CCL7	80.5492	45.9484	58.1086	54.2972	48.2436	38.5056	22.9584	53.3494	55.4673	74.5045	33.5399	21.3284	36.2065	651.365	241.065	85.7472	24.2435	72.9524	137.744	956.436	108.069	97.3368
CCL8	229.338	97.0294	105.738	35.0542	31.4258	64.2239	82.9878	40.6441	77.9002	105.87	49.6186	49.0471	126.767	152.319	4535.52	2829.09	85.4398	1523.49	59.5208	1333.11	24.1931	94.6098
CCND2	299.043	447.615	677.714	682.209	363.697	1162.57	2369.16	460.631	1118.95	330.799	1065.42	6016.73	196.776	378.811	81.4305	108.19	428.171	308.394	337.101	466.685	449.445	314.07
CCR10	52.9887	92.3155	773.818	130.744	64.3025	282.922	67.6002	100.732	54.4414	50.764	81.8189	50.0594	68.9076	63.1279	57.584	73.7311	54.7931	76.2382	50.8701	73.1144	139.358	97.538
CCR2	420.037	360.022	1710.33	312.62	64.9467	756.552	297.145	95.4769	258.898	1151.15	92.1191	97.0054	2908.73	122.771	80.9645	74.5212	115.753	117.14	115.012	63.8285	213.986	243.229
CCR3	135.022	31.1453	52.4803	51.2154	12.0781	88.5821	53.99	20.4848	260.968	37.4963	128.201	81.0785	83.4013	79.2518	59.8893	39.0928	83.6925	66.1017	33.1788	72.4338	6575.5	1435.21
CCR5	98.7636	93.0095	46.8193	992.044	75.4039	462.152	423.397	530.486	503.017	2444.18	578.483	1425.77	489.988	2191.94	1493.35	787.3	1515.6	624.566	149.375	260.554	130.09	85.8615
CCR6	327.499	331.084	40.6441	173.09	69.0404	486.344	155.672	151.091	101.985	262.858	46.4384	122.942	29.5904	17.9736	25.589	29.9201	30.03	42.1897	27.6185	31.6993	34.98	45.6338
CCR7	3811.33	1939.05	202.926	5074.2	8788.6	2693.56	2885.12	1858.53	6339.95	490.805	672.467	482.443	165.235	328.195	17366.9	123.746	290.53	14223.2	66.659	81.2458	647.964	376.156
CD160	446.129	281.825	129.564	1145.35	114.968	125.324	159.179	73.6563	249.12	3283.21	2499.53	688.496	93.8563	89.4107	67.9995	36.9511	71.9584	78.8627	64.1012	95.5795	170.013	231.942
CD180	1502.17	2247.89	1123.32	78.7796	23.1549	37.9632	83.1006	48.8616	179.216	131.403	37.0495	30.9494	576.447	201.364	120.08	2787.64	108.51	93.2677	64.1551	52.7431	108.188	110.541
CD19	7315.69	5295.94	1743.47	132.242	128.204	55.6136	93.4259	148.856	217.548	147.793	90.4861	98.4019	164.903	98.8389	106.445	146.624	122.998	161.334	121.141	130.64	393.166	257.896
CD1A	1294.17	818.783	504.004	208.395	135.372	191.405	139.717	156.482	511.824	265.3	152.536	145.925	312.023	224.986	160.945	156.939	14772.2	1315.23	110.817	174.712	260.606	419.794
CD1B	1351.16	338.331	343.69	55.6776	22.2865	192.553	45.504	21.5309	52.9411	252.417	152.905	109.576	198.282	165.954	76.0826	132.219	15969.5	2349.6	124.04	158.889	118.103	356.884
CD1C	1349.23	2899.13	31.2974	44.1419	77.2347	204.51	33.5802	40.9239	16.851	50.8817	36.3232	30.678	526.834	29.8512	22.8597	167.503	9523.26	1002.72	32.8512	34.9283	24.6375	258.213
CD1D	243.575	416.303	201.532	16.9227	30.1976	10.7908	6.35703	48.6171	52.4235	288.635	16.2496	17.3778	2785.25	49.3553	373.059	39.5088	90.8298	51.3108	69.9761	23.9217	51.5415	136.922
CD1E	53.2515	49.9627	49.2725	52.563	80.7354	55.8777	33.1141	61.9871	75.8264	32.8657	53.7108	34.0771	91.1062	48.5703	40.4788	112.605	8828.21	1421.61	49.9548	51.7658	49.6398	41.448
CD2	419.435	409.582	377.872	8182.95	8002.72	9578.94	7866.43	14057.4	11226.7	5897.39	6247.91	3097.47	222.358	149.915	112.605	188.195	187.612	146.969	332.624	138.589	614.912	576.827
CD209	68.8116	26.7303	23.3735	21.609	99.594	16.5337	21.6059	24.1445	154.815	116.694	42.605	31.8695	84.1738	315.218	190.945	2758.3	2461.15	228.387	66.978	173.32	91.616	130.884
CD22	3293.63	1803.15	19.0349	37.4705	53.382	54.3744	40.6977	45.4123	127.574	80.6119	41.9423	32.5204	31.1523	153.702	62.3613	221.735	154.818	36.801	287.729	205.917	104.764	72.3216
CD244	59.709	38.5118	28.8318	623.695	174.439	69.1101	23.2551	123.377	85.1808	1115.51	1823.54	1702.77	828.43	22.3243	46.7587	96.2814	23.8508	18.3872	105.299	38.3377	2465.48	51.8651
CD247	23.6678	53.6903	65.5526	5508.53	7038.54	5318.71	2156.37	5302.66	9743.99	9129.43	16099.5	15108.3	35.2741	23.9287	26.9337	81.8387	43.679	32.4855	128.466	105.406	459.133	59.8378
CD27	388.82	4138.59	7350.59	5506.31	4042.38	4188.18	1125.96	5710.98	6979.73	2288.25	196.471	127.332	136.409	90.855	137.44	136.436	125.158	111.987	123.912	89.4706	468.498	300.105
CD28	170.654	183.928	145.758	527.403	463	961.774	2294.87	1326.71	1614.2	524.154	77.9604	71.7838	79.149	62.2272	64.4808	207.261	87.3718	66.0363	62.4258	75.1664	89.1808	177.541
CD300A	30.6985	77.9452	103.707	738.031	193.296	414.372	54.4059	46.8193	84.0997	2268.61	5340.89	4668.36	2187.81	691.304	211.105	1737.24	59.4876	26.1949	777.728	1075.46	2406.93	4130.86
CD33	25.3747	16.7175	29.4817	21.3364	17.8372	11.6914	10.4919	16.0074	55.4516	146.462	13.3285	14.2041	1494.4	388.038	241.845	562.116	731.696	15.4784	811.352	870.836	36.39	36.7419
CD37	13247.6	11610.3	802.225	4472.43	2997.96	4287.54	865.416	3602.32	4831.81	1823.24	2090.5	1604.57	4508.11	1453.5	340.017	2337.8	408.062	99.3107	783.709	1104.72	1908.23	3204.57
CD38	588.265	659.948	12117.9	318.883	296.299	205.305	492.628	1145.36	696.507	224.011	1418.27	867.219	237.702	90.8542	12009.4	642.61	65.7776	3371.63	814.674	1366.95	298.705	400.489
CD3D	103.225	174.403	88.3768	14396.9	14916.8	12009.4	7456.75	18921.5	12721.1	11894.3	250.87	243.853	79.1821	74.3095	26.0138	12.2205	106.197	132.551	40.7767	13.2097	795.028	250.997
CD3E	1233.17	756.799	1163.25	5787.18	3554.44	6370.19	2850.8	2993.59	5302.45	1748.88	461.715	342.123	225.281	188.382	172.535	175.318	195.449	276.207	144.399	129.594	425.865	809.11
CD3G	55.9812	87.6081	31.3621	3348.56	2859.41	3066.25	1149.98	2416.24	1298.02	1121.52	252.916	117.44	31.9746	31.4719	22.584	15.4917	29.8358	38.2154	19.6307	17.9017	114.99	160.091
CD4	138.457	118.351	351.016	164.951	2495.27	3710.38	1725.41	4363.02	5524.68	399.538	81.0757	75.9696	3343.91	552.305	1574.34	10105.3	1340.75	701.099	213.866	287.784	163.639	364.557
CD40	1493.35	1328.27	838.389	203.057	119.805	168.957	169.313	129.512	338.66	269.401	164.162	204.806	298.573	1146.59	12966.6	643.639	1598.41	4943.3	111.701	416.06	204.056	275.593
CD40LG	65.3723	51.8326	34.6589	186.485	464.179	852.172	660.742	809.45	31.0481	449.769	29.3032	52.2568	24.7521	29.8606	26.3906	32.0662	20.1645	16.8904	15.7317	21.4343	36.4269	51.2982
CD5	482.771	212.201	459.325	947.657	1101.08	1734.37	918.969	1464.69	3513.78	508.25	283.262	201.67	312.929	259.243	285.092	188.259	270.573	259.619	182.075	219.527	296.94	223.735
CD6	75.8565	91.3498	295.072	1720.14	738.232	3148.85	2732	1835.58	2092.36	342.398	623.803	348.424	90.97	94.7179	137.132	88.9339	96.8091	90.2006	41.957	41.7163	329.727	155.634
CD68	3.28612	8.41213	9.18295	51.1085	21.159	15.7695	30.9082	26.9707	23.836	97.225	93.8337	13.9229	806.305	1705.46	748.596	2770.91	1137.83	687.763	172.447	226.111	45.5969	36.2016
CD69	8246.96	5037.06	131.151	3798.41	4397.04	5489.2	1071.89	6081.16	539.394	4572.32	1781.27	5471.7	66.1029	31.6512	59.0214	28.8125	39.3124	69.457	440.398	1484.63	6363.15	436.422
CD7	15.629	17.2801	18.0226	2234.71	2032.4	1507.77	1271.83	2132.54	7917.98	415.833	1666.68	2106.84	20.4837	16.0113	13.3681	80.6177	27.0726	22.0086	12.1735	20.0477	48.5721	25.1924
CD70	294.657	647.923	528.126	247.621	116.553	266.296	388.275	214.236	1999.95	301.429	226.645	186.472	189.664	162.091	365.349	116.836	163.518	705.601	205.989	115.089	280.442	309.341
CD72	1434	194.059	8.35941	18.8127	43.0453	8.19555	15.7294	10.2308	37.6469	11.484	67.3445	21.0349	9.09632	9.47629	9.58807	123.952	24.2713	8.0589	6.66566	15.5521	13.3774	9.27224
CD79A	12117.9	9835.92	3860.54	425.446	183.377	161.603	97.8461	437.054	424.122	196.767	149.495	139.203	174.975	124.566	108.817	63.5795	138.914	189.64	61.9158	118.776	511.415	261.96
CD79B	5975.19	4719.84	900.57	229.235	284.13	341.386	192.018	425.107	863.467	277.815	364.26	254.476	158.799	68.0462	64.0791	79.3242	61.5971	72.1496	38.4973	61.7153	209.739	232.556
CD80	131.258	345.171	367.149	73.5286	102.086	92.3923	195.417	109.708	392.746	196.598	163.192	139.257	148.429	350.483	3650.81	160.481	596.432	4526.24	120.79	177.186	109.741	132.64
CD86	354.743	599.861	309.418	108.892	35.1452	95.4769	90.3011	29.5846	176.417	341.354	110.138	87.7704	1398.4	764.481	1444.5	2791.66	1729.21	4490.95	161.766	203.619	107.883	161.505
CD8A	564.478	348.109	44.2129	9990.74	41.0751	147.171	161.182	172.473	80.7031	1127.95	959.595	1190.4	203.576	135.985	45.8934	63.4761	176.667	163.445	87.0865	102.835	176.346	623.23
CD8B	21.5309	18.5593	22.1913	3697.96	143.577	16.5464	12.4615	118.455	12.4355	108.7	20.093	16.6832	14.4944	14.7839	9.30666	9.9734	14.2016	13.4979	9.97378	10.9502	33.0054	31.4333
CD96	140.07	182.422	83.8778	1718.97	1432.95	1571.92	253.739	473.005	2933.32	3005.01	1629.78	2127.77	35.6977	37.2327	64.3025	32.9481	50.2615	56.7865	103.367	42.5855	433.031	90.8438
CDA	7.45347	8.28214	18.8379	10.0651	9.68188	14.7321	10.1595	10.55	11.5784	167.178	98.1396	8.14755	1040.42	346.996	8.8175	28.8125	343.409	36.0373	88.0511	82.117	346.483	3592.43
CDC25A	14.4442	13.221	18.4991	9.9042	13.4532	9.04005	226.962	31.4258	29.6178	25.2757	13.2665	142.292	14.7486	18.9717	22.0447	14.7432	14.7959	12.7721	27.8389	74.2423	14.8737	17.781
CDH12	10.6258	18.1476	6.99477	7.9074	7.28569	8.5929	20.5447	9.72924	130.561	197.454	27.0789	9.72924	9.44042	12.7075	12.5197	9.08561	33.1686	23.2057	84.7403	38.3495	62.3285	24.7326
CDHR1	15.7033	21.3572	8.22026	32.7	86.8421	12.7306	27.5004	22.1418	7.93402	130.618	237.1	29.5032	10.5028	9.74633	9.29499	23.8492	6.7857	8.71062	19.2194	11.0622	8.51005	27.5952
CDK6	30.6985	23.0487	15.9445	65.1412	25.7801	99.9869	45.3511	24.2151	69.54	24.4571	27.0588	289.585	21.0665	23.4992	16.7111	12.8258	75.8518	67.4109	47.968	14.1075	64.3897	19.4099
CEACAM3	68.4614	61.8012	104.892	69.0898	59.6401	55.4475	46.6987	65.1206	133.397	120.635	189.913	109.576	242.102	156.081	123.615	113.835	147.504	210.18	186.294	166.523	132.058	2096.53
CEACAM8	77.9172	86.8866	22.7438	143.825	7.28569	73.7311	35.2885	4.76755	39.3564	15.7758	956.068	162.105	6.65065	5.09394	14.1067	11.6576	14.1886	19.0502	2385.03	1835.21	235.265	149.867
CEMP1	28.853	26.0568	5.7835	9.51802	44.8772	8.24507	8.75053	66.9257	210.082	135.659	24.7915	47.3788	12.4177	13.4348	19.1053	44.6457	6.04533	7.79269	11.2227	40.3149	54.4887	30.2943
CFP	4.57372	4.64646	5.38274	14.3869	371.832	50.4613	5.7835	13.9469	47.2587	471.13	33.9944	6.98274	3702.5	27.131	219.191	1971.11	7.54856	451.25	47.8291	214.906	14.5848	2060.18
CHI3L1	9.04005	10.1119	10.0823	13.1606	12.3753	7.28569	12.9436	9.94979	19.889	16.325	344.722	59.6762	12.168	8959.87	3395.66	2050.82	89.8807	473.915	477.055	636.792	89.3301	3791.33
CHI3L2	574.733	445.128	320.506	362.878	662.906	312.188	166.181	4770.06	515.347	404.137	322.039	170.22	200.993	181.814	1765.55	175.384	184.109	210.57	148.964	171.13	317.473	356.909
CHST15	375.062	380.454	2248.88	37.3683	56.315	41.686	34.126	41.6598	82.8415	339.126	43.2967	21.6383	3334.89	1452.25	103.487	1051.69	317.754	99.791	1121.27	895.205	1106.19	4602.16
CHST7	15.2999	17.075	105.354	26.2891	70.2009	367.405	234.005	401.838	78.7506	56.0343	29.8252	23.0381	291.064	314.646	350.888	421.235	193.249	3085.84	152.218	368.051	27.2414	793.148
CLC	317.013	263.81	158.273	91.3851	21.5466	110.252	184.583	91.9805	38.5241	337.915	509.916	237.928	86.566	69.2712	226.713	172.409	98.813	102.234	3917.55	3098.63	26617.2	4605.25
CLCA3P	17.2065	25.2623	11.9499	10.2845	11.3209	2.3079	0.972465	4.36618	10.4516	25.6782	4.29075	1.76176	2.69119	2.02256	0.251594	9.0294	2.31194	0.758568	5.98571	5.42051	18.8857	6.90793
CLEC10A	110.252	95.4872	67.3907	80.0543	56.9721	77.3096	36.9253	66.4662	123.353	154.086	56.0864	61.7027	481.426	159.597	69.3966	5770.13	5129.99	145.475	107.215	150.298	35.2336	145.629
CLEC2D	1012.82	595.045	134.55	1510.85	1443.46	1711.87	1875.95	1689.6	2808.69	332.236	979.224	344.41	93.1345	78.6404	1465.74	187.987	66.4906	2002.18	45.5163	41.11	92.5912	68.7778
CLEC4A	270.684	105.217	19.4836	43.6717	94.8743	19.9956	35.567	67.3907	75.5471	326.223	66.2022	39.068	2802.25	1137.94	51.6787	6742.94	4209.63	558.993	321.217	548.583	234.915	2814.38
CLEC7A	148.856	142.006	58.6425	86.0424	106.67	89.984	50.5246	936.379	94.165	628.337	143.149	89.373	6165.95	3760.31	283.204	3071.45	5359.77	1178.5	634.45	1330.09	159.527	5247.49
CLIC2	8.19555	7.67147	116.244	6.33983	11.0676	4.79963	7.65618	5.41222	6.36193	14.6318	24.6888	30.3854	103.559	437.046	1393.38	2233.16	2244.05	5239.88	8.02945	36.7918	8.44604	10.4187
CMA1	77.9564	68.1061	75.6389	25.2295	42.0952	46.6365	76.3162	29.7531	40.0863	77.404	57.3326	53.0206	58.7683	46.373	65.7628	64.1151	44.7774	53.1224	1378.88	1622.2	164.681	48.2554
COL8A2	135.223	73.451	23.4877	60.5349	79.4302	61.7722	55.3442	62.1844	122.182	76.5983	88.0255	68.4614	275.875	1233.72	33.8435	151.562	129.264	109.199	70.0767	59.7333	89.9999	186.421
COLQ	28.853	27.3981	23.5528	152.774	66.8503	135.326	36.1872	48.3346	163.753	410.259	406.567	351.016	33.8318	24.8409	86.1812	128.156	31.5992	20.1868	51.6734	36.8921	27.5052	40.4642
CPA3	786.597	653.57	431.887	147.696	25.2027	243.299	226.713	148.183	145.527	271.507	458.136	308.127	135.147	139.387	247.683	206.909	132.499	149.42	28290.3	22329	1091.42	522.599
CR2	1471.27	559.635	139.914	245.27	285.697	67.2474	17.8884	25.4993	25.4616	22.2624	25.2701	64.4063	35.1558	27.2512	55.6769	39.4827	16.2818	51.3593	16.7108	16.3265	122.08	33.0622
CREB5	30.9743	24.5582	32.0205	12.4101	43.3955	7.37046	10.978	9.55536	9.36872	15.6929	13.0389	14.4167	360.911	22.8641	11.7627	59.2177	227.549	257.452	23.961	23.3383	15.158	1385.32
CRISP3	27.3782	16.5477	6.50815	3.2355	4.20353	7.58219	10.2072	5.21016	647.79	34.4493	164.026	41.7384	5.03201	11.2986	10.6633	5.55616	5.95039	5.35504	140.207	33.5078	75.7878	15.937
CRTAM	54.8891	66.107	54.0563	1443.48	308.561	114.059	661.277	42.1529	47.769	829.669	261.162	652.858	212.042	761.032	38.2227	85.709	128.64	153.961	15.5496	106.159	78.3306	83.9649
CRYBB1	8.51088	9.16028	16.7748	8.78945	20.228	10.6391	8.2771	10.1849	10.5526	7.6187	9.40236	7.97278	9.39615	9.7069	12.1272	166.955	9.01675	8.79601	38.3769	16.7892	9.49799	9.87617
CSF1	22.1079	21.8152	14.6264	22.9942	21.9402	32.271	235.559	24.1776	159.73	39.1235	21.7205	24.4852	24.5689	687.884	35.2885	23.1222	112.582	93.5346	28.2172	61.8445	73.5934	22.5275
CSF2	24.2487	18.2441	43.3658	24.4197	40.9524	25.8714	1283.45	22.7588	16.2622	62.2696	47.2781	741.315	27.0946	28.5299	18.8245	16.2936	34.0642	38.0303	29.7372	1722.89	20.9643	19.5961
CSF3R	99.7663	29.6136	22.7278	24.3859	107.072	36.1651	25.6594	38.9319	85.4434	338.842	115.644	45.2333	2331.95	214.343	860.337	737.86	92.4843	67.2519	186.095	212.256	248.397	9175.36
CST7	29.7117	21.3348	14.0215	5181.6	197.855	1470.06	746.27	322.062	1323.23	12102.6	11514.7	10179.8	63.6732	254.88	186.806	292.562	1490.44	4059.44	2285.36	2487.6	616.21	2347.73
CTLA4	19.3916	12.0548	12.4	19.0927	282.31	606.104	1865.8	2019.94	4077.45	22.9841	11.0147	18.7122	18.6198	14.3167	8.58076	18.0367	16.4825	12.4936	18.0804	14.8006	62.0224	38.6936
CTSG	247.771	204.703	205.376	113.398	134.496	81.239	73.6946	38.0918	224.974	156.87	309.079	105.314	88.1262	65.3185	88.6601	141.066	69.9828	42.0002	5638.07	5475.91	137.176	185.008
CTSW	16.6579	14.1051	16.3181	4894.22	487.068	963.277	23.0875	14.6382	12.8332	4144	6980.78	10811.4	16.9373	15.9499	13.082	26.7636	16.2395	15.8711	119.469	272.466	41.7898	20.4914
CXCL10	761.394	395.638	246.244	157.227	120.499	152.976	529.512	127.922	256.618	488.545	201.111	1510.91	500.93	163.198	31273.7	278.343	163.718	11302.4	112.809	313.919	332.722	486.967
CXCL11	90.2623	71.7948	44.7905	22.7712	6.63364	14.3306	52.0054	23.4877	42.5131	42.3473	28.5386	183.308	38.4187	16.9051	9059.84	29.3594	21.1203	3956.5	27.8478	33.7736	33.8666	74.2206
CXCL13	50.1801	22.7708	17.2471	22.3574	6.02497	8.95714	280.53	9578.94	13.5043	7.57726	10.0264	16.1251	10.3178	11.7535	627.931	16.7608	12.7141	20.9315	25.7094	10.9456	11.1093	29.7905
CXCL3	73.0704	28.3066	56.4475	26.7117	17.0206	30.0279	26.8418	27.6975	136.624	45.9066	17.3844	30.2181	175.883	1496.82	271.247	233.33	81.0368	157.022	149.961	7936.43	44.0016	75.7692
CXCL5	94.1649	83.049	43.3658	18.4202	7.7599	41.216	24.9405	18.9365	73.8583	78.8889	25.0801	29.0739	32.9347	5315.27	91.9805	46.3814	37.3928	387.404	49.5741	621.747	29.2575	69.6139
CXCL9	597.584	438.209	268.399	125.836	77.4588	151.504	259.461	143.577	159.218	220.911	186.924	590.362	265.083	168.497	38944	199.436	179.981	2918.82	123.556	99.7602	193.921	403.054
CXCR1	260.578	187.059	146.678	214.684	320.96	253.821	76.3549	71.4853	216.89	691.731	515.916	417.187	82.7814	72.0059	61.2698	53.221	65.5299	64.1227	263.789	267.968	239.476	5613.08
CXCR2	26.7636	12.646	20.851	73.6177	5.10767	20.8819	7.64466	11.1583	62.5807	341.363	963.17	280.002	408.353	115.551	174.121	64.0791	176.836	48.427	126.094	56.9347	442.759	17610.4
CXCR5	368.781	298.694	10.1479	32.708	29.7922	181.825	207.127	2508.08	32.4852	31.9392	16.0338	15.131	14.6125	17.3637	212.275	14.4311	17.5363	26.9092	13.7321	18.885	55.8564	19.2923
CXCR6	143.967	137.922	129.418	239.578	92.277	190.125	1140.29	187.523	914.309	1037.8	175.285	139.151	89.8838	60.5045	68.5602	56.0849	61.5491	93.7643	58.1691	53.1451	86.7334	166.601
CXorf57	39.2654	19.4445	10.6258	102.172	236.764	111.244	152.511	14.2424	12.4989	284.272	54.6113	77.3874	8.0249	11.2973	6.69447	10.4459	7.42938	5.41991	7.40007	6.59899	73.8682	12.1591
CYP27A1	28.1703	29.9301	40.8098	35.1156	57.0808	18.9211	20.989	60.3011	55.8977	88.197	36.9152	30.4051	761.596	9212.24	72.621	75.7109	807.582	1970.12	731.426	853	71.578	52.9684
CYP27B1	839.569	393.123	544.742	123.385	89.2151	112.605	253.101	62.7152	451.157	198.916	95.8119	117.912	96.6531	1182.19	6662.56	145.701	203.447	2253.08	88.7389	231.54	179.38	291.092
DACH1	8.11027	6.61425	7.01931	6.07293	26.6485	6.33289	3.99099	4.92986	16.7488	14.2475	34.4165	18.5566	63.0408	7.18212	4.27362	8.23249	5.41845	6.02427	30.5528	11.696	232.945	80.6245
DAPK2	50.4923	52.6611	24.6313	36.7782	35.9388	53.0877	21.0663	20.1996	71.8305	55.8114	75.1908	65.9825	50.3688	36.2955	35.1452	76.6587	50.6543	57.825	260.259	126.567	1104.77	494.764
DCSTAMP	38.6954	19.4623	134.084	45.9545	33.8435	19.2919	61.8737	68.5252	60.4971	77.6658	39.2334	85.3184	100.396	3167.9	171.556	278.806	919.95	632.476	126.015	250.471	145.247	90.6566
DEFA4	364.831	262.809	213.241	580.408	61.9081	252.193	165.641	89.9001	42.8062	290.232	3153.5	224.784	108.49	59.8116	76.1196	88.3768	79.5342	104.171	246.913	174.087	885.317	453.705
DENND5B	47.9633	82.4974	338.595	4.937	5.35474	6.17151	8.63943	2.14073	35.5009	5.92817	28.7555	4.92986	5.01965	14.5868	7.80832	36.7156	12.8774	28.4484	6.11105	12.8888	9.43945	11.0694
DEPDC5	23.0037	33.4468	30.008	42.1083	192.018	41.8509	38.5346	136.495	91.6855	53.645	74.5348	143.26	40.1779	96.6174	168.283	190.192	106.052	38.1782	110.334	32.0167	572.546	27.3392
DGKA	426.968	460.01	200.624	2223.02	3066.25	2690.02	845.849	3860.54	2953.65	550.271	393.43	301.114	300.955	170.086	169.025	215.901	198.329	236.27	148.514	129.29	429.599	314.18
DHRS11	53.99	69.5507	70.1676	88.6181	123.952	27.7175	149.367	72.385	59.3323	34.7728	61.6241	85.5534	46.9596	266.501	18.6003	242.691	1090.34	299.29	69.867	69.5967	27.3827	54.3303
DHX58	13.8636	16.8836	12.8385	67.9751	298.29	30.9959	14.4807	86.5691	85.1508	19.0155	126.714	29.6454	66.4278	21.9598	1394.31	233.583	34.015	1538.1	27.3948	21.8549	18.0591	20.0978
DPEP2	695.457	459.371	11.1807	469.025	1220.28	631.28	9.0294	327.608	341.722	496.446	636.07	22.1565	1471.48	116.274	16.2164	2410.19	502.911	37.7032	158.064	131.444	4131.56	4347.72
DPP4	19.4517	16.5672	15.7817	686.987	689.95	1042.23	892.315	22.5311	866.597	383.706	43.073	391.964	19.6551	17.527	175.698	32.8097	11.7965	138.212	68.7733	25.7694	18.5717	19.5766
DSC1	82.2625	48.0259	44.7905	408.664	788.019	15.6035	10.2183	7.63183	23.3328	82.601	21.2193	23.8159	18.8501	14.9389	11.6692	6.70774	45.603	14.7079	34.5126	35.7068	71.0654	42.1332
DUSP2	13.2983	139.275	32.3402	4083.94	318.017	2005.43	2312.35	2300.26	319.738	4596.06	494.213	307.917	404.895	490.424	567.664	261.495	292.319	536.691	39.9044	758.67	1013.32	88.769
EAF2	3181.18	2020.34	4989.76	219.018	240.986	138.142	265.175	197.165	208.077	181.162	198.017	184.102	683.962	281.012	284.13	281.422	230.817	468.074	401.726	399.882	742.534	240.854
EBI3	10.5027	16.9365	8.89776	12.214	15.0571	11.5325	119.099	11.6348	164.025	8.36817	10.0143	16.8555	12.4947	13.1884	20437.7	311.206	16.8168	6496.24	8.95988	134.974	9.4973	11.626
EFNA5	5.42766	9.11702	8.93307	12.032	116.925	24.2995	13.9593	76.6587	240.342	77.7319	29.8522	43.7964	16.8739	14.6807	64.2662	56.8071	19.848	35.5319	59.9418	12.0728	81.9448	38.5877
EGR2	122.34	98.2432	54.4716	35.3958	35.2447	36.2384	2100.11	1667.33	131.119	151.242	155.235	1331.91	466.593	3919.37	23.0875	2175.76	4531.29	1121.59	293.456	1906.73	1430.72	198.075
ELANE	11.0473	8.90855	9.32863	103.486	12.7306	12.4368	6.90617	9.85722	16.196	18.5045	734.299	167.922	28.9634	15.086	103.353	206.316	12.6893	13.0175	4503.04	4464.67	119.938	31.8788
EMR1	499.011	383.061	194.387	195.896	428.065	312.812	400.218	182.939	335.835	447.967	348.079	188.521	1815.51	203.312	3528.21	404.394	178.678	237.421	287.379	248.173	16330.7	1253.61
EMR2	145.977	106.054	67.1749	43.0595	56.1857	83.2635	72.5369	21.2498	96.2723	165.095	174.229	87.4389	1319.42	1045.04	1516.79	363.816	863.002	357.602	829.241	1558.48	3871.76	3956.25
EMR3	55.17	124.342	135.326	104.17	89.373	63.1996	89.5376	139.759	112.602	136.763	63.8691	64.877	379.624	38.8751	13.536	5.69071	17.831	19.3154	185.983	322.169	4792.73	3015.99
EPB41	21.9842	67.0092	15.2096	235.335	12.2936	385.63	240.814	89.9421	45.4788	9.63975	104.951	97.8029	25.1046	51.9155	7.16549	25.5569	17.9134	73.2098	9.70802	7.15572	104.632	16.4749
EPHA1	47.0294	46.7689	52.0337	400.048	763.401	292.884	35.77	57.8834	43.9325	61.8302	155.783	99.2117	63.8017	58.1182	45.6196	38.9035	60.8482	58.6476	39.1638	38.6947	56.7356	71.4206
EPN2	46.9083	42.2168	109.433	31.5083	64.622	96.2039	50.1184	55.4116	17.8489	62.3642	31.9766	27.9771	32.4359	32.224	30.7411	22.4813	59.1379	31.5687	43.9734	70.258	554.806	51.2611
ETS1	988.873	792.252	410.317	613.494	287.828	1902.19	1261.52	701.542	1031.18	99.6659	759.719	696.267	85.6693	96.6299	130.12	75.4039	120.622	115.702	147.13	156.3	230.763	243.613
ETV3	37.9866	36.8462	103.095	49.0845	20.6487	455.212	21.4843	32.1556	21.6189	14.3074	33.2072	38.0091	40.9568	24.4719	90.3441	33.7686	40.5255	2091.7	17.8303	22.5003	60.8204	40.7559
FAIM3	11191.4	8362.29	254.09	5723.98	8841	5134.62	1145.36	7380.97	4680.73	1866.75	2548.9	478.42	117.871	315.018	53.6976	157.413	147.283	49.0803	58.6842	45.1533	488.447	735.035
FAM124B	21.6702	15.408	18.9211	14.0482	17.1807	20.5009	16.2678	16.0693	13.1806	10.7587	20.0256	18.1886	29.1595	19.3314	9.12936	22.7915	16.6157	11.2646	473.094	126.878	96.5507	19.7298
FAM174B	117.723	92.4672	82.2939	94.1694	137.02	104.088	92.9093	163.115	160.617	69.867	40.336	37.7774	39.8505	53.4051	57.8488	68.5956	42.7977	40.8711	866.81	390.25	73.7899	103.005
FAM198B	9.80066	16.4389	9.14084	4.52689	30.5335	8.4517	5.59882	13.6314	20.5824	54.2764	23.7611	10.2743	515.249	519.512	36.6359	398.226	563.731	45.5332	34.9097	48.3578	58.1632	8.88468
FAM212B	49.9701	48.4461	115.153	23.0098	12.5553	25.2363	70.721	17.6048	98.4512	31.9559	13.7851	20.4848	95.8727	44.3949	15.8193	15.4527	19.3099	12.5008	52.8264	87.806	113.711	569.935
FAM65B	4719.7	5267.74	237.588	3376.09	4454.49	2808.16	256.538	665.208	910.888	2376.66	1586.72	696.531	2428.86	92.8294	193.027	86.8789	136.208	126.286	187.47	170.825	2755.05	8329.2
FASLG	342.839	274.609	188.938	169.217	144.079	140.849	478.987	126.742	171.495	600.258	1537.72	2218.05	108.383	101.15	80.5095	85.7826	70.6496	101.067	128.363	147.268	115.707	250.193
FBXL8	7.71364	3.51511	15.0571	91.1931	53.4748	313.059	66.2887	53.2819	99.5626	47.4255	12.8134	32.6085	43.1056	14.5009	148.232	114.735	67.3626	55.6468	7.76589	6.31855	4.60119	8.57674
FCER1A	106.135	80.9999	88.8159	111.301	70.3334	129.667	64.1151	29.854	73.2325	286.901	168.922	98.1886	622.212	45.6574	56.5487	801.887	2215.37	88.2912	4443.12	4222.61	2525.84	106.898
FCER2	990.308	210.191	26.3739	8.62614	19.3767	10.1479	17.8502	10.3773	30.9749	9.77286	12.5543	13.3681	12.6653	212.752	10.5262	352.928	1104.17	98.2553	13.5398	16.264	31.5291	11.2508
FCGR2B	3389.86	4533.91	2656.04	65.9731	8.2558	30.6985	59.9213	108.558	127.11	121.012	119.945	181.482	287.639	991.968	311.315	1548.94	1529.23	137.204	626.959	1610.4	645.928	1302.13
FCGR3B	434.688	191.942	121.109	178.199	61.4675	133.745	106.498	64.1151	203.851	446.245	494.756	369.661	402.446	256.316	154.082	155.672	158.62	125.098	290.472	123.615	321.047	27547
FCN1	160.549	92.9112	109.931	130.075	144.588	98.7177	63.3727	116.598	122.271	5094.71	465.234	121.809	29800.4	1401.08	306.83	593.096	121.719	120.963	483.48	562.678	168.357	5370.36
FCRL2	4384.74	3466.95	714.637	73.7221	34.1749	55.7795	79.2418	46.9083	24.5345	157.279	54.326	49.0146	47.6563	36.1914	30.9494	17.759	61.1491	38.4073	42.548	30.8697	82.3399	116.184
FES	8.54443	8.67601	10.3439	9.52016	8.03205	6.02497	7.84308	7.26231	8.50406	97.099	211.839	258.842	826.541	41.6577	20.9422	982.2	345.416	10.721	121.959	76.8995	389.55	534.583
FFAR2	12.8385	15.5438	20.1569	11.7758	11.9287	15.8936	16.9426	14.982	28.2729	24.4582	73.9662	13.4413	101.059	31.0121	454.551	87.8165	17.7417	16.5197	76.3395	89.3668	1048.09	4025.76
FLJ13197	129.512	51.641	16.1112	167.32	260.392	110.117	19.8911	41.7629	30.507	30.2589	147.068	36.9511	15.2481	7.57508	15.1958	10.8868	10.0918	8.54957	22.4014	16.5433	76.458	11.6552
FLT3LG	26.2285	56.3356	33.2373	1267.03	2489.21	1471.27	234.492	309.77	644.613	222.022	226.785	367.405	69.2784	18.8623	18.1886	60.3706	18.3306	62.7505	22.8759	47.4892	156.402	26.3581
FLVCR2	69.1805	86.5948	45.3511	83.3738	90.1472	145.872	242.019	256.923	217.178	144.811	140.253	88.3406	566.971	1142.35	1989.42	951.223	2317.02	1056.89	266.923	198.763	75.8073	108.461
FOSB	200.009	243.408	2911.32	41.6529	401.558	59.709	32.1556	5833.25	24.9941	37.5395	32.2286	31.7526	3422.45	29.34	23.1704	22.4974	28.8254	45.8308	92.8253	644.559	7325.61	80.1513
FOXP3	135.978	93.5353	41.2464	65.1469	129.512	190.192	478.811	146.841	2001.92	103.972	31.9856	56.5795	76.153	62.1655	171.731	63.7902	63.2784	64.0282	69.4972	23.2725	140.802	164.674
FPR1	361.321	387.264	343.922	210.203	161.981	240.308	161.244	248.213	222.463	911.948	397.264	303.367	9800.63	880.921	801.887	408.542	281.071	222.401	660.859	716.995	3809.53	27644.6
FPR2	227.451	162.919	101.107	54.9175	60.7802	57.0075	24.3175	56.4475	97.9308	168.839	88.1554	69.0404	964.242	182.316	274.937	95.4386	62.8025	48.599	195.167	344.417	150.792	3797.4
FPR3	325.667	243.661	84.1611	105.808	97.2988	116.598	99.9869	128.484	153.046	196.938	112.658	94.7004	203.421	3004.45	608.269	2357.54	5751.15	4194.21	200.084	328.05	211.115	277.415
FRK	138.305	125.363	59.6049	26.3894	11.2494	5.6391	6.17151	3.21067	6.58822	57.5707	3.65544	6.69447	7.43265	10.8845	3.76299	3.12985	13.4213	18.0569	2.43462	5.77539	6.41697	61.1683
FRMD4A	57.8175	73.558	17.1807	49.3192	24.038	71.8946	48.3346	211.246	38.9861	23.1544	46.142	43.2176	52.7403	161.857	256.173	1094.1	229.183	57.2785	43.9561	57.9116	76.0925	21.6206
FRMD8	197.373	150.74	80.2008	28.9702	14.6144	141.124	249.296	228.187	1019.52	70.749	249.182	162.813	247.252	125.823	271.948	170.773	241.425	290.692	31.1453	134.486	132.153	172.263
FZD2	40.2031	10.7668	25.2027	13.8698	23.7493	6.48248	10.8993	9.46357	14.5466	68.1781	21.5223	11.6108	455.291	98.0242	409.555	777.419	831.752	236.35	210.018	171.535	40.4722	16.4005
FZD3	121.567	138.351	181.163	50.2652	96.6204	39.0416	136.543	449.179	63.606	59.0092	29.435	38.8277	39.7084	31.3368	32.6324	195.351	77.8823	24.3065	58.8458	68.2353	28.0035	73.0087
GAL3ST4	69.5471	72.9335	48.6791	335.593	942.319	238.012	123.377	256.268	169.489	50.3054	35.6643	36.4152	44.099	84.2154	40.45	141.066	141.234	57.3637	198.806	98.7998	310.53	77.3711
GALR1	2.66155	4.34894	5.90308	3.90816	41.0161	6.21204	3.84718	6.99477	4.83586	18.6354	4.22718	3.69898	4.17983	2.44242	4.89763	8.96886	2.49314	3.47511	4.22391	18.246	15.4391	6.07175
GFI1	27.6368	25.203	40.286	293.641	48.0842	132.973	700.661	561.179	587.513	337.367	508.78	394.321	19.3835	29.0337	24.667	26.6084	34.3072	53.2689	1114.64	628.843	40.2767	41.4388
GGT5	11.4982	9.10116	16.6295	12.9997	24.5394	9.26151	11.5782	10.1375	6.91213	14.8026	16.9539	13.6802	11.1302	10.6033	290.215	407.794	21.971	12.629	15.1465	52.3777	99.7	16.7924
GIPR	8.24507	8.6989	5.57083	10.9088	20.2876	5.19509	9.25105	30.9082	32.7475	67.5773	13.4536	11.7281	8.50672	7.24777	31.7304	23.6514	8.58723	11.2653	17.0608	25.509	110.913	10.0528
GNG7	768.008	1494.31	2218.05	133.551	99.4221	104.256	75.9696	63.6462	214.282	51.825	60.4533	53.0877	112.449	82.4101	94.4906	243.486	187.512	70.7912	170.252	115.351	197.772	455.413
GNLY	9.01656	14.5203	19.253	3732.54	134.919	1198.38	233.421	12.6599	24.3666	8201.57	21760.6	23235.4	19.9474	16.5774	20.4069	15.7428	22.3706	21.4504	26.1711	18.3721	24.5261	118.26
GPC4	126.69	73.4117	105.523	43.0244	59.3994	77.9564	53.7586	60.0583	60.955	92.0995	77.4858	42.5845	56.1446	1153.72	129.319	145.872	161.255	86.4733	72.2339	79.6544	31.5548	111.272
GPR1	3.12985	4.7985	2.49314	1.55928	44.3562	1.2442	0.453354	17.1548	52.0842	14.9985	17.2503	1.8637	5.24566	1.06416	0.972465	0.453354	1.02558	2.97913	37.4799	12.2788	1.86974	4.06409
GPR171	33.515	22.9822	13.875	924.372	899.285	969.237	2693.56	227.856	6933.01	4853.06	443.077	1041.13	14.6792	12.0652	25.5177	54.7942	19.2297	560.404	84.1163	46.4161	1086.27	30.6718
GPR18	3056.84	1822.01	15.2867	1037.07	1241.79	678.257	431.408	1521.53	215.753	840.841	1204.17	2025.83	109.666	23.1161	51.6149	54.635	21.8345	33.9473	52.301	39.9014	266.002	156.307
GPR183	275.835	2308.15	296.607	630.528	854.081	3012.77	2265.1	965.207	454.373	475.939	216.235	201.6	196.979	437.173	1631.8	2474.43	437.846	1945.43	303.564	795.551	5121.17	144.067
GPR19	27.0254	36.0835	78.0688	40.6125	73.332	71.8606	373.059	336.969	397.863	29.7668	42.3549	65.6553	19.812	19.6681	10.5615	11.0012	19.8629	14.7471	17.3591	16.0101	237.972	49.9868
GPR25	4.29257	29.4274	141.066	28.7191	10.7786	138.192	12.7547	21.8278	41.7436	10.9335	11.1674	21.4353	14.0459	8.49415	27.3608	14.4167	11.7623	4.70101	22.8178	15.8422	18.2639	16.9119
GPR65	507.571	490.27	162.813	1518.57	572.306	1499.93	850.212	252.28	608.446	2511.23	2138.33	2137.24	1473.16	702.029	263.745	993.554	607.492	155.075	1700.98	1507.87	8034.4	2530.2
GPR97	154.41	141.429	207.651	104.939	57.1513	138.457	94.4058	39.815	136.01	96.937	295.165	418.117	71.2639	98.3684	137.55	92.1907	119.264	138.673	261.461	460.878	4581.7	2246.98
GRAP2	12.6271	15.002	11.6348	280.923	318.911	269.222	151.96	201.267	189.811	166.772	200.764	307.256	11.8251	9.44203	15.9943	20.1279	7.97352	10.115	234.887	140.132	13.6803	10.8557
GSTT1	6.95886	12.4898	12.1145	18.6441	43.1026	14.994	14.0951	83.6809	24.6676	14.7256	15.9318	15.7695	17.312	51.0365	82.5251	520.57	634.226	64.659	349.368	391.849	40.4087	23.0021
GUSBP11	8048.07	10388	30254.1	521.336	587.566	151.265	9.07351	447.762	268.272	15.0728	311.653	98.4389	43.5151	6.40156	14.6144	286.72	9.04525	9.61115	51.7463	22.8936	371.581	277.765
GYPE	38.7182	61.4028	35.6715	26.8793	8.00852	3.69898	4.83349	6.90617	75.9898	61.8922	15.9061	24.753	6.62773	7.19408	7.07164	13.0927	5.36962	8.38658	9.23576	3.74516	8.02246	14.2367
GZMA	204.958	217.19	91.8514	6301.84	440.953	4034.52	1173.96	130.741	318.189	14188.1	13660.5	22380.3	132.043	95.3771	109.708	68.039	93.2939	128.698	50.0748	68.2701	150.589	334.87
GZMB	102.255	68.3223	62.7152	2080.7	85.3613	58.9178	21960.8	64.0354	53.6488	6018.58	15276.9	23235.4	61.7192	136.873	159.297	111.028	30.6782	82.1756	947.077	5600.55	226.971	154.331
GZMH	21.3585	33.9574	41.2464	8555.82	198.934	630.775	896.712	26.3039	79.312	10428.4	11889	7419.83	36.9009	24.8222	15.8936	14.8817	17.7589	26.3463	17.9815	19.6138	52.4825	41.8579
GZMK	184.04	278.181	100.815	8814.39	1423.66	3724.33	187.718	119.848	51.8529	15903.7	1967.19	233.675	67.1375	69.5417	107.072	24.667	79.4561	81.9891	38.1976	76.1424	151.247	421.212
GZMM	6.30541	16.4553	12.3064	1048.99	1215.53	884.013	529.133	1030.22	644.043	893.777	3771.29	2616.39	13.2063	17.499	29.3809	10.3328	10.3094	20.7508	10.5055	31.9997	137.532	65.8267
HAL	380.232	308.503	108.909	84.1753	61.6043	75.4818	78.6338	548.121	79.7409	191.5	99.6015	96.1228	877.179	102.784	90.9599	76.2402	74.7763	54.1152	130.318	91.46	192.072	3105.1
HCK	273.571	489.344	130.583	106.457	107.285	80.3178	81.7989	43.7686	75.0884	737.406	391.703	184.166	7368	3576.18	8146.59	4811.76	4370.59	3772.37	616.141	834.929	3730.86	7443.16
HDC	147.974	177.845	310.116	123.86	18.2423	118.96	82.7124	23.2227	91.9121	90.3347	200.35	150.808	129.552	114.261	200.981	172.289	149.372	109.819	9299.38	9389.5	1119.9	150.614
HESX1	6.86944	5.81023	9.07351	7.04699	8.1724	5.97155	7.37046	8.3697	37.8486	7.64453	8.44048	9.19568	8.36508	7.28572	2324.3	100.313	12.0633	1074.5	6.47249	11.3663	10.3967	7.28393
HHEX	4489.49	2773.84	93.4259	139.035	83.4136	105.021	88.6181	78.8932	55.9092	263.625	245.894	202.846	1914.14	489.308	66.5054	566.325	929.302	94.4388	1317.4	636.739	999.365	946.264
HIC1	5.09235	4.09358	6.79532	8.15993	18.7964	5.97155	7.05796	6.63364	88.0877	11.4497	15.6835	41.8225	7.01782	6.43252	12.5778	6.22385	7.58978	12.1557	8.93759	8.05288	12.8293	7.47661
HIST1H2AE	35.2672	21.8243	277.716	29.913	30.3455	45.6482	11.2494	110.49	64.89	15.8535	14.8482	6.19852	8.28188	6.63361	6.33289	9.27233	17.8976	41.3434	16.9379	29.3602	79.2938	22.1167
HIST1H2BG	17.4432	42.3046	689.646	78.316	138.884	190.055	52.4803	182.147	117.012	72.047	68.3761	11.2141	23.3924	11.4935	10.1375	8.73735	38.3659	137.827	49.4525	29.775	62.6338	45.1935
HK3	12.9436	9.44765	13.2983	21.8141	25.3747	12.8152	21.8936	15.3669	19.8101	140.697	222.505	32.4077	3103.14	3713.56	31.9761	159.122	1093.67	294.171	37.9134	234.231	1199.69	1255.81
HLA-DOB	6607.33	4832.78	4287.54	212.276	54.3407	47.9633	44.0007	118.267	117.053	44.1587	230.425	188.32	102.183	49.6673	1573.19	41.5765	37.2825	2006.95	63.4978	48.718	227.845	96.8865
HLA-DQA1	942.775	1379.12	161.725	173.412	122.694	106.935	167.069	89.1779	621.252	356.732	219.21	214.933	275.353	874.234	4169.72	5225.87	7712.25	6417.32	190.295	390.01	68.2344	218.21
HMGB3P30	30.9743	30.8853	36.5126	42.7999	3.54791	52.3192	40.8098	5.82286	359.741	101.607	38.72	62.1535	27.1958	39.3879	55.1036	37.551	46.9707	53.6143	36.031	16.6542	69.8987	76.9106
HNMT	61.736	55.4757	28.5473	19.6187	10.9677	11.0676	31.7107	8.99261	24.6017	79.5721	26.9129	13.5847	815.427	774.929	161.303	948.839	636.174	279.107	131.757	122.491	25.9124	29.9629
HOXA1	12.9086	10.2332	9.65674	12.8554	13.2616	6.91971	11.0473	18.8941	11.4047	14.5196	11.7673	9.61034	10.6872	12.9153	6.86944	9.89178	11.5261	8.30654	760.292	450.39	8.71383	17.6175
HPGDS	203.791	224.547	125.952	83.7211	88.1375	182.147	92.7892	56.7071	219.694	118.985	177.675	148.339	36.7527	239.785	64.877	138.674	195.445	125.123	21760.6	17743.5	256.519	219.132
HPSE	30.8024	29.5828	32.7452	55.3475	132.328	207.261	494.246	234.922	157.546	302.926	29.9724	54.8891	1285.83	61.937	841.09	894.528	27.6906	30.8414	164.699	103.899	39.2797	973.404
HRH1	206.539	165.458	161.481	75.9744	26.4823	101.149	284.819	78.2921	108.955	212.432	54.0764	42.4701	72.1746	217.659	145.283	2195.07	202.532	128.267	119.111	116.668	81.4171	227.875
HSPA6	70.6496	148.288	17.746	106.717	89.6542	21.312	20.3467	259.19	358.152	78.6991	184.838	284.032	641.214	22.4102	139.863	207.498	65.3133	20.5813	69.2307	129.025	727.068	3303.08
HTR2B	6.17151	13.1148	26.4077	22.7106	11.3104	5.82286	4.60586	9.31734	26.439	77.0354	30.9718	6.95886	13.8505	6.90054	31.8695	216.05	19.648	382.919	52.6928	4.88804	8.27587	7.44665
ICA1	191.405	115.327	209.39	134.253	149.652	289.272	160.779	2419.17	216.274	194.637	133.72	135.275	183.256	198.863	192.888	157.923	204	190.574	218.848	198.986	165.691	309.379
ICOS	6.45883	8.4073	6.14721	194.191	1018.14	786.597	1804.93	7744.02	738.97	36.4221	12.5544	22.5311	5.36245	4.48599	18.5872	5.06523	6.70281	6.15926	5.20226	5.25658	13.996	6.1991
IDO1	241.065	312.452	345.562	241.333	192.087	248.91	201.739	241.493	91.2778	183.592	667.197	671.629	269.466	338.897	26473.4	91.3679	131.573	20536.9	207.892	164.846	1389.42	527.408
IFI44L	24.5742	37.3099	52.9887	84.2622	147.437	127.386	18.3202	132.632	3323.9	492.794	302.401	311.315	307.849	12.5902	6016.73	984.73	11.0323	4019.78	81.3388	95.9882	165.206	74.9768
IFNA10	63.5112	158.422	31.2109	12.5714	14.2557	13.9975	9.37295	15.2732	155.242	10.4593	8.56565	13.1648	13.1043	10.5485	8.4859	7.99712	21.862	8.55497	31.3169	22.4462	11.354	20.7783
IFNG	233.246	168.084	137.391	249.079	107.327	142.182	6344.88	208.339	174.269	269.393	247.349	3575.24	108.149	105.054	96.3643	71.1513	75.8374	92.7857	109.183	70.3222	157.021	187.162
IGHD	10811.4	2526.48	21173.5	62.3477	125.466	26.1416	21.2038	135.569	28.3673	27.1054	32.5821	21.6874	50.4304	44.7005	97.727	106.396	78.4267	56.6384	32.6027	30.0385	257.507	79.2556
IGHE	18.1741	73.9246	4949.62	15.6329	46.8193	54.2786	23.0381	51.7474	18.5756	28.08	19.3651	15.5289	25.2919	23.5125	11.9287	16.0978	36.2382	14.9484	67.3917	25.5289	62.7863	45.893
IGHM	21960.8	14250.2	31273.7	361.738	46.9357	156.939	260.578	2116.01	593.857	226.077	162.309	134.865	127.044	32.1071	32.6772	26.5183	44.4179	41.2559	70.0258	41.6499	834.003	98.1312
IGKC	27164.5	30254.1	36524.4	3097.47	489.18	40.3629	67.8879	329.598	351.684	2059.74	324.357	121.612	318.07	78.0753	235.954	170.836	64.1869	223.334	100.706	162.917	1108.47	119.997
IGLL3P	6633.54	8962.42	42851.3	217.465	18.0093	41.5176	96.4086	50.2748	551.698	36.1928	33.4549	62.7899	70.0394	45.938	157.755	102.126	159.033	142.297	37.3651	56.0642	80.2797	83.4349
IGSF6	46.0713	70.4017	65.0179	27.0987	40.1757	48.7108	35.6445	27.9373	56.7644	137.796	100.289	74.4145	2662.14	6076.58	295.072	1626.55	3679.74	1231.56	156.33	366.635	246.694	4222.73
IL12B	105.275	89.5993	56.9721	41.9429	28.4477	59.2554	77.9172	42.0952	43.4756	84.1218	85.5832	56.9	42.4261	43.5577	513.085	18.653	73.4785	2407.55	38.0766	72.4095	68.6242	127.55
IL12RB2	13.4413	18.3382	13.0704	95.1151	33.8647	106.889	726.45	117.534	219.438	386.713	594.047	1531.02	20.5039	19.7917	14.5274	43.6477	14.0306	10.6523	39.5491	31.2744	11.6883	14.1674
IL17A	24.1098	31.6668	13.1992	7.0187	6.54773	6.56042	294.033	69.22	11.1874	18.3272	9.51161	8.08761	7.92935	7.62259	11.8435	5.79721	7.65336	8.5562	12.0683	20.2032	8.06335	39.5476
IL18R1	32.7452	56.2153	34.9008	197.574	73.2243	243.853	400.361	119.237	512.492	1022.47	829.447	1084.44	19.503	19.5417	7.98404	32.563	22.9411	21.8143	1442.75	2220.3	1494.97	516.094
IL18RAP	63.1653	45.386	22.9231	541.607	83.7597	275.231	367.96	101.484	113.069	4488.26	6172.26	5732.17	92.0218	93.7542	24.9752	38.641	88.0776	89.0952	239.274	362.477	1797.7	2653.49
IL1A	207.809	114.033	101.484	65.8237	98.0215	89.4108	147.654	52.9321	47.7084	104.001	81.8042	75.93	61.1099	627.608	90.0234	27.0475	107.468	387.972	140.51	2906.37	2009.8	204.893
IL1B	508.142	364.92	198.79	144.219	136.962	251.102	200.421	204.288	284.085	352.159	250.043	241.591	1257.18	1273.46	675.122	291.825	437.07	2781.9	3282.43	17770.6	1137.89	3099.35
IL1RL1	161.244	100.369	109.841	34.5629	19.3205	70.1295	95.8847	69.0001	60.4059	98.2789	65.3508	125.083	37.4237	98.0894	93.2607	76.1196	100.319	44.283	730.476	1305.54	971.174	102.91
IL21	346.044	299.77	161.725	59.42	21.3428	81.5844	333.191	1466.93	42.0591	87.9964	38.6803	68.039	103.572	83.5887	59.6401	42.6729	78.1234	62.5209	96.1301	60.0152	93.3864	201.098
IL26	6.12067	7.62384	26.2663	7.41092	7.90237	9.53239	273.571	116.598	20.8208	10.7375	7.69138	5.13666	3.42456	2.49113	4.33019	4.36618	4.35573	4.5319	3.03223	38.0155	4.7763	4.55767
IL2RA	151.265	216.017	79.812	85.824	87.1615	360.445	4978.13	184.438	3823.56	31.1804	42.0444	628.16	25.4112	33.9872	3963.77	146.46	44.9506	2221.9	193.265	310.005	133.808	31.2229
IL2RB	2118.46	1945.52	848.687	4000.22	818.793	2988.61	7562.49	7279.25	12662.5	10958.8	18026.4	19190.6	321.961	294.551	221.979	172.968	246.88	366.143	341.969	442.605	381.194	1044.85
IL3	20.1279	12.5855	13.8149	9.15713	9.48525	8.60384	1689.6	15.8681	37.2922	5.97639	13.5921	28.8125	11.5263	9.76241	10.0457	7.30959	9.89183	12.9434	8.37076	411.28	112.543	12.254
IL4	10.0823	28.8426	39.1214	13.1707	10.4459	10.7786	232.713	118.004	31.8695	32.6334	12.252	9.62447	8.87234	7.66457	8.67366	7.42909	9.54952	9.2842	7.28263	10.1454	52.5688	34.5858
IL4R	11009.3	1883.67	291.13	884.659	2125.33	1148.81	864.196	414.23	3102.32	913.588	851.3	1609.9	1192.22	1054.29	3007.59	846.614	1093.75	2410.48	3106.48	4652.79	1117.61	2809.1
IL5	6.61825	11.6119	9.69458	18.7116	11.3691	35.0736	159.955	28.0728	86.1697	34.7039	8.1695	13.8149	11.479	11.3283	48.5858	18.8379	15.9633	22.5392	12.5706	317.691	22.8151	13.259
IL5RA	122.289	101.543	197.234	42.9451	26.5887	63.9311	43.6207	32.2031	103.2	118.432	45.6795	44.2707	41.0237	36.1397	43.7397	22.0447	51.5829	55.8662	154.524	105.685	713.16	256.057
IL7	250.925	611.452	40.0906	41.5794	34.707	69.255	30.3254	68.388	43.1569	27.3943	24.7613	26.2285	51.3943	93.5035	133.487	79.2008	68.8808	143.507	55.5905	25.0301	18.1319	14.8919
IL7R	277.716	454.55	126.098	15195.2	19513.3	18085.9	1965.11	3066.25	507.16	2118.83	1159.34	341.629	163.305	5078.29	2163.37	85.5914	2156.18	7799.65	36.5611	325.729	358.084	742.672
IL9	60.0583	42.7062	16.7352	43.0656	31.3621	89.9001	6525.44	46.35	15.3743	47.4614	45.8169	31.828	15.7455	22.7463	28.8318	10.0708	31.5147	34.5558	4.12514	15.587	56.7921	24.3296
IRF8	9506.39	7886.09	218.314	350.349	279.688	45.4123	487.566	610.549	196.616	992.357	1625.38	2594.87	2458.71	1929.66	12117.9	3495.42	1652.36	2798.26	363.726	798.945	519.985	281.068
ITK	468.999	409.756	192.218	6471.89	9578.94	7704.63	3954.85	9006.84	7176.36	5787.06	3056.94	3981.74	124.101	115.022	90.2245	71.2657	102.08	166.178	1344.48	1083.59	654.698	380.47
KCNA3	306.276	411.387	1214.68	573.905	465.48	975.655	324.103	263.915	74.9929	440.651	411.394	577.173	143.553	102.942	129.913	20.6166	23.5447	24.0017	13.8169	18.0042	120.507	65.0352
KCNG2	12.531	21.6233	203.722	18.1524	7.92416	12.0781	12.531	13.0927	7.93358	7.28188	17.8817	15.8681	18.8429	21.2866	32.6523	15.9312	16.3577	15.5225	18.1724	21.5578	26.699	11.7052
KIAA0226L	7209.22	5267.69	147.381	41.6978	82.7923	64.877	50.3667	26.5348	87.2938	97.0527	54.3441	30.3631	176.396	104.6	210.47	711.669	61.8126	43.4273	108.407	90.2151	435.451	2046.3
KIAA0754	9.87055	7.16598	4.81803	23.1185	80.9645	7.8792	4.36618	76.1196	56.1673	60.2282	151.046	150.259	44.7905	7.81907	414.805	157.755	7.9526	4.64921	7.69025	54.6433	85.3978	7.87007
KIR2DL1	7.40644	5.15713	4.49318	8.01647	12.7924	6.33289	4.12623	6.19852	24.5539	24.1777	281.984	532.252	5.11644	4.75183	8.60384	8.52212	4.5319	7.02348	30.9029	25.6528	7.45318	12.3442
KIR2DL4	331.776	242.597	326.566	122.225	125.324	79.0053	62.5414	71.0029	119.611	247.045	602.973	1692.52	128.825	99.7435	300.013	75.0782	110.773	151.831	97.222	116.991	187.147	282.809
KIR2DS4	621.7	437.145	512.456	280.161	113.605	120.499	87.8165	129.462	189.826	544.822	1172.83	3017.55	129.085	114.125	136.085	62.9641	137.386	106.756	147.352	135.055	121.447	344.854
KIR3DL2	12.2458	10.5791	7.59574	22.0604	14.1669	9.25105	13.1648	9.92645	30.0312	214.491	511.294	1163.92	11.3889	9.60889	28.0155	13.7678	10.6414	9.63754	17.2002	14.7244	13.6424	20.0196
KIRREL	15.5289	13.7066	28.1314	34.2335	26.7835	9.69458	12.9556	23.9529	171.466	30.4286	18.2087	12.139	13.6408	10.8753	22.7438	37.9632	14.3057	11.3119	42.1158	19.7889	34.1017	15.7432
KLRB1	119.573	241.325	39.3735	8818.27	317.566	10026.2	500.689	4477.73	1260	12634.6	12957.4	5576.72	90.2462	26.6851	33.3991	13.5124	94.7988	37.0021	37.4871	72.1378	276.44	322.616
KLRC3	13.8407	44.6164	9.097	724.776	13.1886	32.0205	12.4117	5.44255	47.2092	586.938	1485.99	662.143	12.5856	6.24598	14.4442	9.75315	18.6764	9.44773	8.28115	15.2143	34.5013	8.77366
KLRC4	68.2502	85.0751	24.4663	218.175	48.8011	17.6763	22.2069	9.62447	33.7634	124.802	205.178	119.985	20.0549	24.9315	17.061	6.45883	10.409	5.35637	14.1484	12.2503	4.90098	44.4641
KLRD1	204.007	170.206	244.549	1670.27	75.7836	207.881	155.962	149.026	59.9991	3580.07	7278.15	6195.93	81.0215	53.1724	62.8912	75.6389	88.9547	61.7902	69.9817	47.9637	58.5005	195.37
KLRF1	153.15	198.61	112.864	851.188	21.9077	127.237	37.0575	13.0244	8.5397	4962.36	10475.8	5911.21	100.115	41.2904	76.1597	182.536	75.1535	65.0283	69.5823	59.5979	107.025	121.908
KLRG1	1351.16	1076.36	482.771	3859.15	467.472	1939.94	275.52	283.204	373.325	4631.81	1700.86	912.267	305.447	270.204	253.101	148.566	250.08	224.202	1310.19	1313.33	448.571	605.395
KLRK1	670.271	280.471	77.8429	8228.46	353.846	276.246	69.1446	105.149	44.3235	5199.52	8790.5	5454.73	78.9162	44.1476	38.5609	62.472	71.212	47.2592	88.0196	77.9887	441.42	246.444
KRT18P50	23.9704	28.1515	87.8165	23.808	44.1209	22.8749	18.7122	30.4705	73.2104	162.088	23.747	16.9179	58.2063	20.1811	56.9721	20.1721	10.0553	51.6255	14.9773	18.0863	163.038	68.388
KYNU	296.299	573.255	97.4243	45.9486	41.3564	39.2061	27.3782	22.7438	128.328	117.086	70.0715	66.7065	858.745	3089.35	6316.57	1059.12	1973.6	7308.58	132.062	327.691	62.4804	100.109
LAG3	36.2957	8.73253	10.1479	521.321	6.26463	175.186	999.694	1296.73	656.821	884.936	139.854	23.5043	7.92284	6.75909	1427.7	97.6772	20.8602	215.174	12.7599	22.3277	5.07071	8.17094
LAIR2	424.479	238.183	166.955	1078.39	212.523	371.034	81.4305	234.346	3022.38	1320.82	1596.84	1637.52	103.003	85.5472	207.881	88.7396	96.2269	78.26	85.2787	114.867	376.255	260.851
LAMP3	47.2828	46.6682	128.432	134.784	120.927	160.305	368.632	165.584	264.04	132.201	210.826	418.71	38.7623	316.777	17116.2	113.141	1014.14	23356.3	81.9463	130.06	540.571	320.923
LAT	157.413	133.151	111.423	3224.98	5669.61	3282.26	1447.74	8480.62	3200.7	2738.32	1722.58	1262.25	239.583	603.686	162.813	181.953	205.265	218.747	3738.76	2477.47	405.703	209.655
LCK	337.44	327.11	40.8098	8763.86	8948.35	7786.12	4042.38	9578.94	6736.74	4299.61	3604.57	2808.16	80.7588	64.4552	25.9955	22.8597	43.7917	57.6156	33.896	20.8497	245.233	186.869
LEF1	30.9082	28.4866	56.4812	1204.84	2704.72	1154.22	412.928	495.873	364.873	144.343	115.193	115.853	12.5416	11.5183	11.8316	15.8062	11.6118	16.851	20.3309	18.4944	107.146	31.2755
LHCGR	154.689	195.379	59.3994	9.89745	24.4663	8.2558	5.59882	9.41974	139.09	126.934	21.7148	26.0678	11.4701	31.7589	23.0381	22.0316	20.6374	21.3168	31.7528	22.2362	51.2502	82.9157
LILRA2	20.8819	19.9715	13.2373	20.1625	27.3986	18.0226	13.57	14.6382	11.5879	151.849	101.395	38.7717	1764.82	852.08	317.686	220.179	135.314	67.5687	133.875	107.11	283.331	2439.78
LILRA3	7.15304	6.78733	5.58379	9.02114	28.1127	6.05262	7.38294	5.62515	40.7209	19.253	20.3795	12.1019	880.457	53.464	973.175	154.52	27.0561	394.948	37.5755	18.2534	81.141	117.46
LILRA4	33.0212	111.708	65.087	24.7782	17.4575	57.8488	18.4317	9.66943	500.191	40.0153	19.4983	18.1212	65.6877	44.4159	92.5041	38.5861	34.1614	31.1841	15.2038	8.33105	15.6327	63.1084
LILRB2	30.8866	28.114	15.5661	25.5742	6.64639	9.99668	9.08561	12.4368	61.8982	357.619	201.72	36.0903	3344.12	541.407	4796.5	1185.83	250.193	291.791	334.358	328.451	1013.35	2905.94
LIME1	23.9209	43.8231	1021.39	1287.73	995.055	1225.6	171.907	801.887	383.174	666.809	181.478	47.4626	78.1625	41.8288	34.537	50.3354	42.4277	48.5118	45.0411	104.288	52.5652	79.5383
LINC00597	15.983	18.3267	7.21404	6.84173	60.4387	3.68102	3.72054	33.9572	12.935	65.4169	128.014	72.7276	23.1863	11.3705	87.5607	126.347	7.57251	6.36978	68.9801	313.742	142.381	20.7146
LINC00921	675.122	227.587	145.596	132.811	40.6441	146.144	22.7915	103.312	71.6171	70.8828	116.246	70.4734	69.038	21.4857	43.4735	70.7971	21.8107	30.6908	24.9314	87.9466	427.588	287.71
LOC100130100	19.8475	28.7509	7525.22	23.0508	19.1205	16.0978	15.8681	17.1674	12.2361	17.1419	10.3529	14.7091	16.1383	13.761	15.9312	14.6144	16.1139	15.3566	18.8119	13.0601	15.5716	17.2301
LOC126987	135.569	103.543	195.695	72.4532	106.312	91.2817	101.197	23.6017	749.8	23.7671	86.3773	76.6222	68.1921	49.25	120.128	101.406	85.3483	91.8998	52.8221	25.0177	72.2632	91.2733
LRMP	2106.84	2947.59	1042.75	631.913	861.661	327.499	185.186	2003.33	135.969	613.08	1245.63	436.58	1048.68	155.304	38.7994	773.492	535.906	114.675	727.18	621.283	6331.43	3231.63
LST1	29.9842	20.9442	39.9482	520.378	264.602	332.373	131.1	36.8714	71.2982	1394.2	672.959	291.322	5975.19	2191.48	2243.55	2286.08	3691.09	946.6	1225	1641.97	4186.04	9953.02
LTA	11.6811	12.0153	12.6027	21.1657	258.388	27.6975	2867.61	524.477	138.299	13.2819	24.1884	2880.86	12.5162	12.5287	114.104	14.982	14.6004	12.8246	12.9561	17.7881	26.3185	16.8352
LTB	10351.6	12117.9	106.629	9829.72	13247.6	12009.4	5257.45	9725.14	17485.2	3372.61	1009.91	16862.2	321.356	127.317	116.286	161.002	184.548	112.061	222.259	400.906	2136.99	5458.25
LTC4S	61.1296	25.9438	66.325	132.358	77.1189	78.4084	50.0922	112.515	13.4889	117.934	162.857	97.9755	91.8755	110.095	145.925	581.669	224.329	67.023	1156.12	1035.92	595.916	114.193
LY86	6947.98	7763.97	815.009	382.952	398.872	198.552	176.744	208.498	379.337	1584.31	243.116	224.076	5218.06	1832.78	1246.62	6395.57	1997.21	601.102	297.421	221.121	654.471	691.785
LY9	289.073	607.834	552.034	1310.96	1851.72	1298.43	51.0458	979.013	199.263	1132.32	271.973	28.5058	30.0009	34.0146	28.2941	252.28	74.1775	32.7997	53.626	25.9837	71.6093	59.9381
MAGEA11	22	32.7273	33.6952	20.7278	9.27233	46.8193	31.4907	14.268	78.552	84.0851	19.8797	10.0097	5.93275	8.16545	6.8817	5.47357	12.4408	7.14547	5.96527	28.6909	54.7214	18.0576
MAK	20.1135	20.289	15.0571	8.15219	13.4413	9.82298	40.9239	13.8407	9.96012	22.075	11.4715	14.9579	24.8142	11.767	40.7237	106.23	13.8301	54.0124	27.9095	58.2589	356.324	1120.13
MAN1A1	293.526	262.019	4141.04	239.418	96.3643	219.425	337.677	280.633	242.052	294.362	381.991	308.664	205.526	541.541	493.866	534.806	366.549	444.627	641.745	519.595	169.353	662.108
MANEA	3.43659	17.6022	658.341	52.6888	48.3642	63.6155	343.197	85.7472	33.2363	24.982	72.1721	132.973	67.0997	120.266	81.6927	117.008	111.352	130.22	87.129	34.1284	4.4502	3.04754
MAP3K13	5.15251	4.88791	10.4581	7.38196	8.88663	6.38254	7.50078	4.94511	9.2449	6.50203	7.17607	6.29263	7.05178	7.23932	37.0841	7.84308	7.96423	195.751	5.5452	6.09872	7.76688	7.9937
MAP4K1	48.65	923.459	201.465	1721.22	2431.5	1387.56	1231.7	4278.45	2031.18	1550.1	747.315	451.449	317.967	25.6081	31.1039	367.271	58.9839	23.1068	361.742	310.298	272.973	35.1823
MAP4K2	10.6504	12.6324	8.42736	17.706	144.696	20.0115	85.1934	16.9815	32.1151	10.7797	11.1254	10.4329	12.042	15.0538	9.05087	11.5998	11.2841	11.2268	8.80753	10.1335	10.8278	12.2408
MAP9	10.2984	13.0837	8.28887	93.4008	96.1573	25.3052	55.7452	64.4808	22.3117	3.35357	37.6368	43.7102	1.42101	2.14073	2.38782	3.78524	2.57433	2.77256	2.77825	2.81567	8.73923	2.7384
2023-03-03	611.985	264.942	286.095	78.875	110.899	78.5953	79.7366	183.641	205.257	85.7698	190.571	194.257	103.566	175.875	328.074	56.5487	138.056	125.251	1744.53	2814.29	1152.38	205.075
MARCO	9.0294	10.7417	14.4685	14.4579	38.5609	10.7103	14.4917	24.0051	27.2561	12.8198	16.116	13.7294	236.736	2418.05	48.7727	117.151	17.5205	15.1549	14.2287	26.6154	21.0621	14.6427
MAST1	9.25105	14.9058	845.849	6.64017	10.1849	8.22026	11.1463	19.1803	18.8545	8.10348	10.7148	7.64466	8.49261	7.33323	9.15145	8.53329	7.34003	7.65439	28.7744	20.8472	15.6	23.9864
MBL2	59.0537	96.1266	15.6914	2.66146	21.3747	6.17151	3.59401	3.74022	133.631	38.1354	14.1521	6.33289	4.93937	9.46493	5.3981	9.19568	8.24077	23.8051	4.8729	5.57559	2.33225	21.7545
MEFV	27.2835	27.2299	14.2424	10.2958	7.22582	12.6721	8.23249	11.6576	14.7399	44.2812	19.7633	14.7683	552.712	12.4959	10.0823	9.17343	11.069	10.8642	18.0619	16.2754	21.0153	871.816
MEP1A	939.626	391.2	222.386	54.1763	22.4298	141.229	43.1304	54.9223	169.547	136.175	85.6285	89.4108	98.2613	171.933	25.4824	66.4662	186.618	321.883	25.2977	96.7027	257.504	165.37
MGAM	8.04398	5.31114	5.16682	3.96432	4.92986	6.15943	5.09235	5.7835	9.15013	48.5137	314.541	47.8752	159.713	14.1331	5.16682	5.6658	8.88169	6.62539	234.353	137.717	609.183	5009.47
MICAL3	328.982	319.773	89.2951	100.601	19.3066	126.69	131.452	93.5863	14.4332	38.7602	40.0477	117.912	15.5702	19.845	25.3579	17.8119	21.7202	22.5856	150.532	127.629	47.6824	10.6393
MMP12	746.926	488.893	163.901	79.2716	52.709	114.875	105.149	81.6927	265.139	233.258	98.1638	84.9536	95.8511	243.059	399.19	221.574	15992.5	3929.35	207.794	2823.79	241.241	296.412
MMP25	136.288	125.533	196.225	211.532	232.463	168.154	115.672	162.757	370.105	134.733	149.938	457.328	446.48	119.313	1099.92	583.938	563.306	1130.61	147.125	181.149	1253.63	4281.64
MMP9	338.944	388.106	357.975	286.914	359.615	395.42	258.478	424.479	396.894	338.895	688.249	284.13	335.43	38944	2727.98	16386.1	3188.62	2899.73	1191.48	12655.5	635.086	6429.78
MNDA	29.5032	276.079	5.02271	50.8186	9.21739	8.75053	4.5257	13.5007	38.2862	2157.23	790.372	301.321	11447.6	2609.87	4016.52	1867.62	4559.64	2133.56	2154.02	1279.19	3154.58	22598.1
MROH7	23.0552	26.7631	330.053	28.6742	29.6055	31.4907	27.5577	33.164	19.7241	52.9065	19.1112	24.8341	31.9287	30.4905	26.7234	24.0217	27.3899	29.8171	39.0897	67.8949	37.2994	35.6514
MS4A1	18085.9	17478.1	396.391	343.922	52.229	220.858	125.466	112.287	272.7	505.156	193.332	177.386	128.634	31.978	94.4906	64.1902	64.5661	122.19	80.2912	52.0939	704.401	274.659
MS4A2	151.202	187.591	119.197	108.622	99.1354	111.383	94.9203	79.2008	67.676	124.424	93.2797	69.1805	52.1772	70.5035	67.6999	68.7742	73.0631	95.0804	4441.18	2673.25	321.659	126.264
MS4A3	121.291	62.7547	60.998	80.8622	8.75053	40.4195	20.8819	35.1209	36.5391	105.015	592.617	191.135	23.5532	7.81822	20.779	38.2227	15.8738	21.2322	1963.69	893.552	1384.1	174.69
MS4A6A	1102.97	616.096	326.352	221.196	167.864	216.369	177.717	149.251	453.076	2149.72	222.71	191.823	8814.8	268.508	402.562	16167.2	3743.67	167.436	704.436	501.773	408.738	1136.62
MSC	28.9341	44.5217	115.153	78.7852	42.4125	85.709	243.575	31.9551	172.577	132.072	60.9848	42.3037	47.4679	631.845	1562.14	101.484	573.366	1844.92	63.7632	148.361	75.2824	111.475
MXD1	22.7765	22.4068	25.9603	67.1778	255.888	110.943	65.2926	148.911	94.3387	100.623	201.823	62.7533	250.016	83.1937	135.729	26.569	18.2441	247.665	27.8835	51.8774	1552.58	2389.81
MYB	365.48	297.354	123.904	648	590.59	269.624	838.001	1793.19	735.502	250.061	615.521	235.713	300.762	95.3128	78.1025	118.91	97.4474	366.991	4336.14	5021.57	3653.92	505.081
MZB1	46.8193	122.259	20117.7	42.839	70.2364	9.91497	21.7831	18.1609	65.4667	62.5158	21.7605	26.1599	24.8565	22.2707	30.4274	33.8191	23.2132	22.4117	30.7949	29.4934	52.5266	29.7963
NAALADL1	11.6232	15.794	10.5615	70.9831	207.96	147.328	20.4544	150.751	48.5703	62.4683	344.958	228.019	31.5238	14.3773	8.28887	10.2861	7.32037	17.6609	8.86794	11.2147	15.8679	15.8925
NCF2	153.496	345.136	194.191	62.3428	225.028	88.1785	60.4761	68.8116	425.69	1620.91	483.385	168.836	12280.9	15650.1	762.035	11487.9	11149.7	3147.59	956.168	1619.08	20110.6	17226.8
NCR3	152.012	792.851	42.5845	1756.08	250.102	411.611	407.223	201.404	669.218	1859.56	1482.73	3218.19	56.9457	30.8333	105.996	55.947	86.3358	33.0987	96.4754	83.5166	146.73	223.273
NFE2	6.09454	6.76898	11.8671	107.356	48.9856	33.47	7.61889	56.3807	67.6835	79.0454	134.364	82.8706	1517.64	30.5501	32.4288	110.076	12.4099	11.9599	233.716	148.196	272.887	2938.87
NIPSNAP3B	1577.98	744.774	349.55	128.037	41.7108	137.605	86.0562	79.2418	106.126	497.434	152.773	105.193	89.5717	79.7027	105.236	106.935	69.4821	124.343	207.153	142.55	153.991	331.76
NKG7	6.99477	10.3385	7.72618	8640.63	106.539	679.691	947.373	7.58219	18.5123	10086.4	13911.2	14574.7	34.6546	4.93467	217.225	6.54773	4.9613	6.55772	429.353	573.003	24.2643	13.3157
NLRP3	22.1418	20.5327	15.3784	15.3058	18.4568	48.0532	14.1784	11.6576	28.0412	51.5852	44.6026	88.8957	636.629	32.5057	37.6791	322.062	310.278	19.6889	26.8499	423.073	68.368	478.877
NMBR	507.384	573.646	242.527	45.6383	8.77366	31.0596	92.9954	20.0406	117.852	183.173	29.1551	48.0532	77.8573	49.4452	16.4218	35.1722	81.8034	17.4299	11.1989	24.638	103.947	201.752
NME8	4.03108	3.92866	3.86656	4.66239	6.42155	3.21067	3.69898	3.74022	11.9191	34.0487	253.546	13.4175	14.8253	5.97286	97.0905	422.96	24.1423	7.97883	58.475	23.3366	117.609	10.3646
NOD2	6.93252	10.1885	224.313	8.39871	8.56837	124.141	147.974	116.112	42.7854	146.631	178.258	166.062	1302.13	91.5637	2182.91	811.254	31.532	249.207	31.6866	7.93924	617.723	689.376
NOX3	12.0097	6.68283	6.67074	7.38221	8.61552	9.10729	7.48907	8.53329	5.48658	66.2489	7.47562	7.10661	11.1731	7.87797	9.7069	8.99261	6.58104	7.1391	133.312	215.579	6.27168	15.1294
NPAS1	18.2277	16.1954	27.8993	24.542	10.2527	20.7203	8.31133	8.5929	159.759	12.0898	12.1803	12.9556	14.378	15.3627	12.4957	17.3916	15.6061	15.1895	22.0496	13.7874	19.2717	23.0757
NPIPB15	1624.15	2800.24	1335.66	315.438	11.1029	753.236	217.616	262.148	1476.41	908.381	288.974	230.681	176.782	212.56	282.216	370.158	246.267	154.042	82.5556	173.876	399.875	1079.51
NPL	18.5872	15.4317	51.4356	84.1412	16.8003	77.7584	115.435	26.3219	67.9754	151.155	98.0337	113.508	856.406	1653.08	501.962	4287.54	2046.53	469.32	552.919	434.399	1095.72	2221.13
NR4A3	136.962	146.699	133.94	83.3665	117.49	96.7967	315.267	165.584	462.391	158.621	81.3748	142.727	91.301	198.742	448.709	100.485	479.801	2205.78	126.341	1237.55	4000.43	289.595
NTN3	6.56042	15.1702	21.4843	8.66871	23.2906	11.4873	28.1515	7.66803	180.394	39.585	5.96053	6.67074	8.72821	6.38705	11.6232	15.7166	5.55	7.93202	3.852	5.96859	12.8956	14.6312
NTRK1	13.57	13.7366	28.0548	10.6243	22.8422	15.0196	21.0813	9.8349	11.2707	17.7064	9.51007	13.6096	11.9146	8.11604	8.77366	8.95714	14.8742	8.22009	353.886	1165.77	24.8362	16.0578
ORC1	23.6848	41.0092	30.4705	48.7875	40.5305	49.6901	571.851	149.821	27.6705	17.566	28.1674	199.519	42.2689	50.2754	21.5309	49.3371	43.5207	20.2469	138.276	141.323	139.658	15.7046
OSM	2.05303	2.70864	2.05303	3.8234	2.3079	4.81803	45.0175	12.9436	142.651	20.5538	2.26419	172.717	4.07168	3.54071	3.12985	6.3191	10.9103	3.537	13.9468	8.40893	1657.87	188.238
P2RX1	161.725	37.9093	36.6123	180.798	168.409	119.891	110.766	142.886	70.4502	184.552	133.765	137.761	686.859	198.679	134.649	356.214	162.159	57.6301	2865.6	2193.46	1302.72	1169.4
P2RX5	9725.14	9116.67	2524.75	784.988	670.831	770.018	524.855	2876.6	725.344	1108.13	507.746	492.82	175.541	33.0503	21.6874	20.0115	37.2128	35.5353	174.366	298.992	355.902	35.4646
P2RY10	436.58	348.903	408.38	319.105	340.883	516.369	293.21	313.29	931.709	107.441	236.991	207.498	20.9578	11.3697	20.4848	16.6432	5.34076	142.707	27.3326	59.5371	1812.07	350.024
P2RY13	9.19568	35.5967	8.02048	7.47061	7.35724	6.46999	7.27466	6.98274	10.2025	233.214	76.9282	13.8149	2786.28	120.649	473.334	2965.89	25.7896	8.1943	43.7898	60.8815	1447.84	4885.26
P2RY14	1638.86	196.048	30.6985	154.861	63.1996	75.4039	76.7759	33.7444	102.953	512.625	214.645	215.228	51.7107	7.68102	21.3585	852.556	214.753	24.7276	2202.53	1476.44	9767.66	1604.24
P2RY2	11.6576	13.6019	9.90306	14.9726	11.6692	11.4155	13.3559	20.6326	10.117	12.4214	14.8344	11.915	172.181	86.5803	11.4415	9.46357	10.694	14.5935	14.4635	89.7654	944.408	20.4649
PADI4	10.8638	14.7249	16.9934	54.8131	22.0601	15.9445	24.6134	19.9229	9.85899	140.672	117.712	26.444	765.874	15.8207	17.759	12.531	21.1377	36.5802	110.349	145.704	609.723	834.179
PAQR5	23.5528	20.5251	15.541	14.1791	25.7985	15.9574	14.8817	13.0591	36.9374	28.619	16.9254	12.6962	14.2305	301.514	18.2809	17.4691	19.082	15.7695	367.64	291.659	16.3392	21.3501
PASK	513.869	628.041	674.835	1441.39	1036.99	2312.35	982.669	7489.42	1422.86	232.667	194.695	256.268	146.709	114.194	240.986	221.421	159.755	188.64	189.825	170.798	412.543	260.125
PAX7	67.6002	81.2673	281.52	23.3115	25.7303	42.5547	34.3224	37.9866	107.199	47.5768	13.9977	21.9077	38.0368	20.5506	24.2487	19.3349	32.2086	32.6891	22.8858	40.2643	82.8596	43.8946
PBXIP1	399.906	918.022	803.586	1520.32	1070.73	3186.54	192.087	1612.6	3045.59	570.958	527.87	195.077	253.475	80.0967	197.578	410.874	290.732	562.839	173.227	203.168	835.091	980.023
PCDHA5	5.12217	7.92943	11.4291	15.4359	25.9241	33.8647	7.73695	11.0217	107.68	43.8131	10.2112	11.3907	10.2896	10.5554	85.9386	8.2558	13.6417	6.04593	10.7444	6.114	10.2706	12.678
PDCD1	103.873	124.685	105.44	153.862	130.699	149.026	234.767	2598.76	263.948	208.089	128.534	122.449	153.262	114.241	134.595	133.071	111.799	122.186	130.333	95.2768	223.738	277.599
PDCD1LG2	17.2471	11.8152	12.2092	12.805	15.1059	11.0347	14.4167	8.14755	75.96	15.6681	22.0111	12.9203	14.0179	55.0451	448.874	343.439	116.374	813.79	9.97975	18.4394	72.1116	22.6252
PDE6C	0.972465	3.75128	1.47909	1.934	21.4194	6.21204	1.65886	6.60682	1.64625	6.31719	14.8988	2.38782	4.55648	3.19069	2.99219	3.50515	1.99354	10.5724	8.28162	1.11917	46.4739	2.18143
PDK1	32.8097	24.8667	1399.42	231.295	518.453	121.152	170.899	117.296	486.749	23.3703	32.9252	37.9632	25.631	126.874	131.258	121.945	96.8358	22.4736	23.6775	30.1564	571.517	43.6525
PGLYRP1	18.9082	23.3446	20.1135	9.95704	9.78903	15.629	16.084	19.7704	12.6251	16.0779	99.2742	30.4274	13.9799	13.3804	12.649	15.4787	11.0513	16.0567	237.888	262.499	752.183	1587.73
PIK3IP1	2462.09	1132.15	728.372	5245.61	5090.53	4353.54	461.309	2315.26	4814.02	1330.85	1203.07	322.61	647.754	249.271	209.465	1631.8	295.079	259.742	557.4	310.247	780.146	545.65
PKD2L2	9.7069	6.77668	24.8172	18.9053	52.0634	11.4626	23.1222	6.03929	47.3763	47.6786	10.9787	7.92416	13.3966	9.8641	12.7432	20.1135	5.88538	14.5085	160.858	48.3207	259.951	62.5623
PLA1A	35.6207	28.1193	15.1565	16.1139	16.4589	7.84308	14.268	19.9388	16.468	31.5912	25.1395	12.8487	59.3558	26.25	2799.77	14.404	38.041	647.107	48.997	43.3708	53.1552	26.0352
PLA2G7	100.732	79.0612	69.9407	24.3188	12.7667	36.5126	39.2654	37.6006	108.845	178.742	73.0994	50.3057	1290.2	10066.6	1679.06	1569.46	5706.82	5086.1	1067.95	980.108	43.5154	59.0924
PLCH2	31.9135	14.4442	32.271	26.9269	169.193	136.855	42.9338	176.084	981.148	71.6641	152.094	132.377	47.0658	31.4083	44.5041	29.6257	18.775	30.8709	36.2777	74.7392	102.883	101.447
PLEKHF1	39.9214	32.6638	301.519	884.511	341.008	508.739	485.645	919.885	373.285	1042.96	1513.84	982.2	45.5333	292.52	73.4395	33.4925	40.5843	34.5708	73.3669	281.004	61.6666	50.1118
PLEKHG3	11.3907	10.8056	11.0789	293.525	76.7344	559.742	106.629	26.0138	17.7529	927.803	855.492	317.791	417.65	137.043	590.797	180.272	25.6788	21.4213	204.776	37.6832	1449.68	1603.25
PMCH	12.4	10.595	16.5602	7.0561	12.9667	14.818	138.142	9.80066	9232.54	19.4491	6.72716	11.0903	9.49164	8.82206	6.06637	7.41776	9.76337	11.8849	10.02	32.3372	10.8105	13.4286
PNOC	4198.53	4255.8	3031.84	88.6779	64.6933	65.6942	83.0232	22.1079	82.8029	192.035	65.3665	78.1376	230.847	93.5751	42.9899	92.9954	68.4616	98.8269	62.5268	105.352	156.274	269.361
PPBP	112.73	89.8385	166.644	61.6725	65.6216	58.2388	20.8958	63.6462	117.729	476.662	37.9054	17.4957	80.4667	3754.15	230.146	292.992	91.226	211.939	78.2133	1402.08	52.0206	564.58
PPFIBP1	68.7742	10.814	17.0471	40.7662	45.8635	26.7835	19.7563	5.4591	41.7896	11.9742	21.6981	9.75315	24.457	36.4249	6.90617	11.4758	218.621	76.7271	44.2042	30.4511	8.53965	12.0558
PRF1	201.957	236.135	213.412	8182.52	847.81	2130.07	1288.37	953.501	1643.01	15440.1	26164.6	27164.5	142.749	88.716	55.1357	23.1549	67.8649	103.921	346.365	285.221	268.372	422.67
PRG2	98.8428	125.311	157.53	126.647	107.029	139.101	165.454	35.3128	68.5254	16.547	70.8192	82.7124	117.086	103.375	295.679	263.653	85.4789	89.8306	19061.4	20880.6	189.27	59.6527
PRR5L	114.465	191.972	14.2801	302.018	88.7805	230.075	127.967	56.4812	70.0695	758.374	1048.39	1138.96	109.13	36.0795	74.9309	109.086	12.1949	77.2308	335.823	374.279	432.932	183.371
PSG2	1541.92	1234.84	423.094	157.146	109.531	214.862	99.1354	80.9266	294.243	352.744	148.449	136.135	170.07	156.968	95.3014	126.992	116.271	146.261	80.5048	42.8699	61.8766	553.499
PTGDR	84.749	75.931	34.611	549.73	59.4385	135.829	56.5155	38.9319	36.9455	407.859	1627.92	2044.54	36.2589	25.255	40.9832	26.7835	32.5776	29.8008	21.2377	29.119	137.787	79.2027
PTGER2	47.3788	20.4964	21.501	2260.8	258.842	4236.41	1056.86	14.8559	2608.2	2957.93	2983	5770.13	1154.31	619.163	170.395	1754.34	584.124	826.856	460.429	892.072	501.023	183.698
PTGIR	32.0662	21.6554	30.3631	46.5103	233.246	59.6049	161.002	24.8504	1296.62	31.9775	31.0638	30.8664	482.862	37.7912	1832.07	1096.66	27.4025	1333.26	196.252	113.905	26.6106	47.1062
PTPRCAP	4113.17	4036.43	905.817	4378.93	1887.92	4607.98	1493.35	5576.72	3413.92	1703.23	3602.35	3305.99	35.7657	26.3021	18.4449	30.5122	29.6088	51.6965	42.2402	16.4595	351.605	40.9839
PTPRG	106.583	96.8888	84.3262	3.79883	4.27362	3.94927	12.6027	12.9884	154.792	67.0174	8.39063	5.59882	6.37327	9.60027	31.7526	4.70676	8.9314	18.2435	9.87267	2.9782	2.9929	109.628
PVRIG	874.709	1156.81	303.25	3978.91	2515.25	1786.8	818.474	3927.76	2477.59	4095.75	4533.06	4025.41	99.8828	68.6564	20.7645	113.369	57.3622	96.6921	87.8153	17.2273	164.347	357.655
QPCT	15.5899	25.7861	2273.28	24.0352	3.41162	22.2227	65.087	2.0118	12.203	22.4979	69.3929	48.5246	1499.93	2646.76	113.835	1278.36	1578.8	420.58	235.906	247.866	38.6778	3236.17
RAB27B	7.83161	10.4975	11.6576	25.2562	23.272	35.4335	10.7908	22.5138	68.2196	40.1399	91.1955	82.1807	6.93152	6.06258	13.5007	31.3408	13.5363	29.7332	907.939	649.757	28.8082	8.59015
RALGPS2	1597.11	1305.48	112.819	57.0268	40.2571	23.4223	36.8021	28.212	98.9013	85.4815	54.5636	32.5413	44.86	27.2458	22.0316	63.4436	37.7035	39.5414	44.0888	47.5618	56.9276	109.43
RASA3	10.5615	24.235	13.1402	270.981	156.482	327.847	24.5742	71.2289	79.6083	68.9679	212.79	65.3311	93.3435	21.3644	14.4311	115.94	17.299	12.3226	15.3721	19.0983	26.6645	19.4265
RASGRP2	5911.21	5135.51	68.8116	2427.95	4016.52	2855.39	121.34	169.599	1173.44	997.194	1363.76	256.538	759.979	41.209	120.64	102.042	65.8803	130.574	281.324	209.593	1547.79	1260.17
RASGRP3	458.36	575.453	3254.1	16.2266	28.7949	13.6687	13.7418	15.8434	93.1489	16.025	15.5115	19.0777	11.4392	735.01	552.034	1320.7	986.072	1037.51	57.225	90.1858	77.0016	15.8927
RASSF4	22.6771	18.661	15.1179	22.9819	29.2554	19.6695	23.4877	25.7631	67.8215	20.6472	228.528	146.196	672.104	591.626	3036.44	560.785	657.841	2481.69	39.5302	30.9134	15.5773	33.7739
RCAN3	46.6661	40.6645	41.2995	155.03	219.644	566.986	193.094	28.8125	332.67	28.3536	7.23561	25.0117	41.6834	54.9882	37.6006	28.6715	30.5551	106.627	6.23015	35.0728	10.9914	5.26993
REN	63.7557	51.2803	391.964	30.7495	76.8134	42.4701	37.2987	35.7949	74.051	25.6337	26.149	26.4263	31.4489	30.597	29.9437	26.0311	25.3695	25.1845	87.8579	51.6107	33.5244	43.2934
RENBP	53.6055	41.6905	23.1549	45.591	37.113	34.3453	40.6149	18.3336	33.375	37.6646	20.4386	34.3453	215.088	433.093	777.77	1584.31	205.937	113.66	101.644	192.926	306.39	77.0876
REPS2	40.3629	27.9527	23.9209	13.8876	12.0895	18.9522	8.28887	18.5713	22.28	19.439	16.0062	21.7177	153.288	14.4958	9.78903	171.231	46.4036	43.1156	108.25	19.052	735.572	1345.64
RGS1	180.199	246.272	742.002	646.722	215.673	1496.61	1321.5	1981.05	1384.65	110.307	147.042	255.51	64.4417	147.149	184.994	63.8235	62.1036	3515.83	507.24	474.485	6082.81	111.35
RGS13	71.2657	70.4912	269.913	26.921	11.2033	22.2227	7.84308	7.97278	27.7212	60.0099	36.2712	29.9437	18.736	9.04132	5.13666	3.82861	4.08349	34.6737	2908.94	3858	1591.02	19.8344
RNASE2	186.472	164.907	350.768	216.873	156.133	98.7636	102.519	83.7597	107.053	600.512	663.055	230.075	3614.28	144.229	407.223	677.714	143.263	145.721	1975.14	2222.69	6527.5	672.191
RNASE6	1799.68	1157.23	2281.11	17.0513	28.1314	64.4438	8.86355	22.1728	11.3732	777.255	84.5879	14.3677	4038.45	2527.65	306.169	5075.1	8418.34	853.615	681.365	506.467	144.009	2002.13
RPL10L	36.0387	70.343	311.315	321.35	328.074	588.702	346.941	160.245	144.445	184.475	91.2767	98.9284	95.7049	57.3155	53.3494	70.3334	26.9817	75.5232	182.734	140.712	24.8215	13.6945
RPL3P7	76.8505	379.486	1151.46	1290.95	4477.73	3370.86	1067.78	2289.14	1429.67	649.198	256.676	55.1036	109.461	25.6758	39.6473	31.9351	20.7984	74.4774	459.178	252.447	266.182	142.538
RRP12	12.8152	12.5725	546.135	10.8322	10.2629	14.3173	378.729	17.2718	28.9685	9.38933	20.597	75.4449	288.345	98.8497	11.7281	14.5147	35.4971	11.8487	26.9147	173.353	930.231	274.094
RRP9	9.54453	16.3321	17.5485	92.3615	116.424	49.5309	524.282	82.563	21.6171	72.6399	53.2923	186.602	36.1323	164.951	183.181	91.1632	29.2975	16.4331	110.62	173.367	45.9058	9.94509
RSAD2	215.228	211.215	215.517	164.102	230.681	222.858	149.426	101.608	852.591	390.708	300.348	666.804	334.986	78.8724	6976.48	140.167	115.741	7545.53	399.435	312.62	1070.38	713.359
RYR1	108.558	115.914	61.532	134.679	13.3104	134.919	161.981	214.172	1289.51	142.581	38.1114	76.7344	128.592	205.797	72.9949	102.3	117.169	105.54	15.7971	55.4883	75.752	199.924
S100A12	190.663	205.61	206.614	103.089	122.046	78.9688	77.6091	114.327	93.8562	2375.56	1088.21	220.626	11149.7	143.016	258.3	123.701	132.832	138.87	1054.17	976.508	374.452	8781.77
S1PR5	7.99712	7.02749	7.65618	41.049	8.4517	6.54773	6.84333	8.88663	5.61564	13.0671	587.658	175.698	6.78845	9.80063	6.63364	6.43369	6.92011	7.66804	8.97421	9.12493	8.09185	9.35291
SAMSN1	197.088	441.901	574.922	794.816	609.276	1660.13	2859.41	577.401	1973.85	1571.7	1266.57	2876.6	1412.29	645.689	5090.53	3133.9	2070.55	7507.18	6327.08	4360.9	11409.5	1654.1
SCN9A	7.11929	7.90594	8.43938	5.5994	20.4394	6.40933	6.27698	22.1418	39.7499	56.5346	11.2458	10.5941	6.12899	6.72086	111.605	88.1004	304.809	6.08488	61.2251	108.671	17.7601	15.2382
SEC31B	64.8014	51.0818	101.239	423.472	539.266	63.7902	23.5721	163.901	1073.5	58.5038	248.32	30.9743	136.548	33.1826	58.5085	492.069	38.3377	29.7514	207.473	231.166	179.502	40.5672
SELL	11102	8002.61	376.905	7418.86	9805.46	7104.51	2531.5	4188.18	5165.45	10585.6	5741.49	1590.66	7242.74	103.92	234.172	287.219	121.954	137.33	353.99	288.717	3001.39	13724.9
2023-09-05	10.8993	18.0659	52.7372	13.1122	56.7692	37.9866	43.4735	15.3908	256.754	93.467	19.4941	22.412	16.5041	14.4017	27.4613	14.7934	14.3202	25.8689	23.9839	23.2521	35.9402	25.7361
2023-09-08	27.7175	22.8798	37.6536	31.0278	35.0009	35.9388	272.617	126.645	33.1677	30.1964	26.9758	67.2842	15.6211	27.1893	183.066	72.0103	34.6678	19.8322	417.782	267.468	24.5112	21.7778
SERGEF	15.6914	11.986	11.0903	63.6079	264.236	28.5879	16.2288	189.143	15.8212	17.2702	64.1819	41.5765	20.4217	24.0606	113.605	103.011	16.8398	19.0611	88.9832	39.4062	19.4984	16.7439
SH2D1A	30.8664	23.7458	17.0206	1249.21	910.037	1354.89	1484.48	2984.36	2057.44	1522.34	1296	844.708	18.418	17.338	17.5347	11.3907	16.5125	27.6285	22.1716	43.9516	29.3115	41.8751
SIGLEC1	258.3	149.399	98.5201	81.5005	55.5443	91.0726	46.5724	55.1357	132.288	181.122	98.8058	88.8159	279.322	116.43	6220.79	3457.59	447.608	2742.91	185.663	145.666	126.374	245.932
SIK1	5471.7	5620.45	7279.25	1219.2	494.427	410.007	162.041	4922.27	942.261	393.187	457.652	248.295	544.809	146.153	292.992	111.244	104.812	228.177	59.7068	326.996	2371.94	401.547
SIRPG	74.4145	127.736	55.7452	1310.14	1078.54	1148.81	293.21	3092.33	2278.4	713.821	98.3464	57.8834	54.8626	31.737	80.8494	39.5088	30.07	83.9412	13.5953	25.5024	81.7698	125.145
SIT1	759.159	1505.45	424.479	1457.87	1418.52	1612.6	927.391	1676.24	4164.94	1324.14	115.127	107.757	99.638	121.974	60.4029	107.757	411.731	77.5517	76.7881	51.4097	76.9888	286.526
SKA1	4.91436	2.77047	3.23618	2.22063	15.8936	1.65886	353.189	53.8275	32.197	20.9602	17.1915	41.3564	3.19849	4.37549	6.57229	15.6035	2.81889	4.75106	30.7677	18.0812	5.43524	2.0938
SKAP1	1378.74	556.927	875.146	2273.26	2670.87	2395.68	814.249	2389.17	5831.85	2886.35	2037.38	1513.44	155.106	188.029	115.435	100.357	168.339	153.529	498.346	480.989	445.017	388.847
SLAMF1	762.035	515.487	1019.77	496.422	449.836	1081.53	2005.43	1074.94	1504.85	720.652	114.124	115.62	111.909	131.709	6057.92	845.507	126.441	801.522	58.056	157.558	243.983	260.858
SLAMF8	156.65	135.592	79.4302	107.641	72.6907	101.406	85.9785	48.4924	37.4348	218.213	170.426	95.174	166.406	2483	663.473	1407.52	2859.32	358.466	237.642	389.302	111.152	120.652
SLC12A1	89.4899	48.9366	9.10729	10.7794	13.5972	11.2033	1.8637	1.8637	20.2315	37.9201	3.63992	3.86656	3.33513	3.69927	5.19509	1.71207	2.70881	1.78681	5.25015	18.1912	24.7591	8.29309
SLC12A8	7.22582	8.43487	52.0634	14.92	11.1921	3.74022	9.30666	34.8238	48.4225	7.50347	10.1479	18.0658	11.9881	466.059	24.5565	25.3394	37.9571	52.2419	447.923	581.406	107.009	13.1631
SLC15A3	9.05087	202.449	10.2629	18.571	27.126	19.3645	13.0927	18.7964	9.87289	74.5094	11.7452	8.4989	1682.54	4564.07	3860.54	5890.34	3688.67	4650.12	321.295	438.816	20.3902	1431.04
SLC2A6	112.564	313.23	42.9022	43.0756	8.05592	15.5899	24.8858	11.0789	17.5414	213.152	70.7367	125.466	623.894	328.746	6057.92	579.734	500.226	1981.2	552.658	528.636	14.4136	12.1747
SLC7A10	66.7807	84.617	110.632	33.201	19.6695	53.1212	44.819	626.652	23.5688	14.7767	31.8503	24.3686	34.3089	52.921	34.7291	26.3219	37.7982	53.0534	47.677	11.7742	34.6614	50.9745
SLCO5A1	118.73	108.129	82.2939	30.0687	55.9127	70.9679	41.7937	15.5781	112.933	35.5305	73.0934	49.5927	40.6934	42.4867	954.038	39.7571	42.9359	1056.08	14.9805	26.3143	29.1103	131.434
SMPD3	70.721	140.541	328.737	70.1268	148.972	47.6216	17.2585	516.154	27.3493	99.2227	89.684	154.573	35.6363	44.175	66.6362	116.467	23.594	53.3365	15.1724	30.9053	1685.73	246.551
SMPDL3B	2.72437	3.0344	6.77178	3.73038	5.87719	3.84718	4.62442	4.91436	6.38705	9.07379	4.58851	4.18249	4.66174	4.12578	4.75106	4.03108	3.67896	4.24831	4.79592	5.2825	155.785	6.39158
SOCS1	27.1479	25.0917	16.8555	160.803	64.4438	117.817	1034.18	255.148	604.66	80.8809	49.7027	1230.2	20.7159	82.3657	2300.26	705.135	103.72	398.844	50.3436	59.6082	52.2713	31.6938
SP140	881.126	2397.76	1001.79	422.125	367.675	549.336	376.905	529.723	659.022	475.959	411.772	385.248	107.995	76.3505	170.899	30.8241	75.7959	212.574	54.8895	26.6094	654.275	218.17
SPAG4	16.3961	24.9571	3657.84	60.3482	79.5892	64.6603	120.176	87.3166	50.0881	83.8786	8.39987	50.788	16.9456	34.0401	21.8278	11.6108	11.7459	50.7	41.6397	106.803	52.479	22.8419
SPIB	3945.3	5363.44	128.967	67.0248	111.244	74.7103	74.1053	88.4972	12.7382	98.6916	106.926	78.2542	116.392	57.8151	1435.06	31.2109	57.5329	40.3159	75.1771	73.1264	83.3815	272.82
SPOCK2	1531.02	1120.73	433.013	3283.92	2040.44	3212.76	1022.45	3128.51	4263.98	1757.14	995.652	650.463	263.011	175.984	132.219	118.307	202.716	217.046	211.728	172.417	437.589	594.01
SSX1	1.65886	3.90027	3.28612	7.38499	40.8098	2.49314	9.81223	25.4453	117.075	58.083	2.16137	1.47909	5.1671	9.73938	7.46634	23.7651	14.9909	26.6187	26.0341	18.9064	43.1234	14.7796
ST3GAL6	66.6016	34.3894	66.1414	7.1584	12.9667	6.48248	6.98274	20.8819	20.2346	45.9792	27.1083	18.3888	357.977	524.564	41.0751	192.218	398.946	1251.45	742.833	710.127	1574.93	466.521
ST6GALNAC4	264.327	441.005	2093.52	408.11	297.029	398.872	276.246	263.279	799.852	351.595	240.264	227.042	195.846	688.735	133.983	243.299	349.132	182.627	113.491	129.748	134.832	181.689
ST8SIA1	50.5617	44.9647	9.74185	75.9392	9.12936	278.432	97.3394	2924.59	32.7697	78.1915	6.71835	14.1067	8.21878	5.38292	13.6096	3.80787	6.25761	14.9602	313.284	62.5897	5.01864	15.8826
STAP1	3534.5	1961.96	983.237	112.06	432.519	110.857	108.061	92.3923	615.508	68.9591	299.871	435.481	21.158	25.9444	372.921	43.5348	47.6347	120.756	3297.99	2140.77	831.871	48.561
STEAP4	4.42067	8.3539	7.81977	4.83229	10.4919	2.34695	3.41162	3.59401	71.1893	7.88	8.75623	17.2718	111.873	5.31029	22.3509	26.4638	48.2881	4.30429	33.1835	43.2228	25.0236	800.57
STXBP6	16.7352	15.0438	32.0662	16.1391	18.7689	21.4514	14.4685	17.8502	8.58636	14.445	10.5691	11.9972	12.8961	12.9026	24.2487	13.1282	12.409	14.6102	315.807	239.976	16.2944	14.8059
TARDBPP1	42.0395	48.2471	11.1921	20.131	56.9	38.5346	63.6841	29.1325	4.88205	104.026	13.5914	31.0814	9.11205	40.624	4.67247	6.60682	30.7846	22.0351	18.5975	23.0453	47.6217	62.0112
TBX21	504.199	543.924	450.319	1658.32	162.992	522.107	1173.96	445.521	334.05	1805.13	4208.89	3311.98	273.277	315.861	526.577	86.6079	245.494	178.261	141.104	151.26	242.206	542.159
TCF7	32.1556	157.174	24.8022	3170.4	5181.11	3207.17	351.366	4668.36	754.809	910.699	415.149	151.562	18.6557	24.9866	284.032	43.9115	32.5686	55.6527	22.3556	21.5766	451.365	55.1159
TCL1A	12117.9	763.145	493.518	106.739	133.693	105.523	62.12	138.674	108.723	106.646	104.999	78.2921	161.46	108.831	109.219	72.9599	90.2489	122.397	50.0323	93.0399	259.756	261.739
TEC	11.2624	11.136	9.61034	11.9909	8.99261	9.64692	9.19568	12.7432	8.92091	14.8067	20.2225	16.4589	16.2986	19.9862	66.0748	50.3667	14.6221	21.1657	23.416	225.491	80.5783	12.8773
TEP1	13.0006	15.8775	6.80596	98.3561	13.1774	95.0466	15.4787	8.39361	9.25182	9.5509	181.4	91.5687	16.1057	8.99194	69.8679	112.196	48.0734	12.236	13.6038	5.70725	8.37097	11.9961
TGM5	60.1266	71.9977	785.594	47.897	41.4661	47.0938	40.9832	33.2373	71.1877	82.6331	56.8534	60.6769	64.5338	55.8532	69.9795	126.545	58.7558	77.886	118.496	160.109	152.158	82.7555
TLR2	81.5427	113.709	115.985	120.528	135.729	126.842	102.086	151.848	81.9856	438.586	138.335	140.216	4560.19	793.699	4668.36	3071.45	1202.76	487.126	680.788	1591.23	118.7	5374.8
TLR7	49.8143	102.499	37.6242	7.99722	58.3653	9.7069	7.26231	36.2957	49.5799	84.8572	31.8438	10.839	570.652	34.3505	966.705	546.925	35.1959	60.1152	33.4473	22.9809	158.434	20.087
TLR8	7.58219	6.71493	19.4517	5.70075	5.57083	6.83095	5.73046	39.4827	5.72307	91.598	5.82572	6.10712	1522.07	646.606	2380.2	1082.1	553.72	667.193	19.0583	9.50032	7.37022	1719.87
TMEM156	574.498	577.033	771.38	168.082	114.828	152.976	334.198	276.906	221.731	207.159	138.883	141.959	23.4517	26.2528	17.4691	21.159	30.8877	23.2258	23.7353	29.2535	288.549	51.4486
TMEM255A	64.4808	43.7749	47.1588	38.7207	5.07911	22.2069	16.4717	4.57372	52.6537	63.7344	49.6384	29.9201	66.8499	354.626	289.164	167.015	926.137	979.656	43.7293	12.8586	3.95744	37.1108
TNFAIP6	267.918	259.892	141.18	81.2944	36.7156	94.248	79.1233	63.6155	131.885	147.684	123.774	145.819	233.439	347.164	19190.6	325.364	245.951	8826.49	253.262	2285.7	203.281	3460.95
TNFRSF10C	44.8463	28.8512	27.8208	27.0392	25.7801	57.2893	44.9055	21.9555	33.9743	39.1311	20.0664	37.5763	237.906	48.1788	42.1807	75.93	53.9903	48.905	79.2265	82.6221	288.979	3919.77
TNFRSF11A	50.0278	32.3654	28.0358	9.85568	6.81844	22.0759	45.7718	14.4561	930.527	87.7032	86.1279	68.5602	17.8361	37.8991	74.8202	396.391	281.48	708.126	24.8695	80.5936	12.2549	67.7636
TNFRSF13B	502.693	1498.26	1292.53	181.955	307.696	120.08	138.989	181.953	379.554	372.417	227.504	167.069	188.008	158.639	240.986	171.907	167.565	186.024	163.091	187.863	290.793	342.777
TNFRSF17	22.5998	247.609	7744.02	13.8152	4.34766	13.4413	7.94761	7.85531	41.1834	10.0425	12.5097	8.91036	10.1099	10.5914	9.40921	13.5243	10.5918	17.5241	7.22768	6.53418	20.9897	9.35211
TNFRSF4	15.0196	14.8278	142.832	18.7105	22.2069	524.477	1997.16	1178.44	2852.97	21.352	195.893	697.704	17.7698	20.7387	1462.5	441.126	203.481	1646.19	76.9463	347.397	25.1523	28.1862
TNFSF14	10.0823	9.719	9.55536	92.3165	28.212	59.184	428.355	168.836	258.135	17.7746	362.102	2050.82	35.0723	936.655	20.4544	16.0454	17.9537	8.69152	13.5	66.4649	291.778	614.12
TNIP3	14.1298	31.8676	12.3302	70.5004	64.7279	30.8024	446.309	257.641	48.1476	43.9138	18.2598	11.8671	14.5235	241.166	1192.71	17.3641	23.1178	47.4836	42.8467	106.085	41.5302	15.7445
TPSAB1	1102.3	794.72	151.731	376.037	43.3658	284.819	147.274	481.073	28.7889	262.643	465.22	311.74	543.629	358.101	368.913	365.48	397.887	396.86	27467.1	29437.3	918.512	1033.13
TRAC	572.511	1006.35	215.827	13721.5	14057.4	15532.2	8731.94	20117.7	19538.5	3189.24	815.685	506.054	208.978	252.24	151.317	142.613	215.624	255.938	159.568	187.167	880.09	790.006
TRAF4	194.799	450.381	103.832	27.4174	35.3878	88.2179	248.213	107.502	48.5723	40.0103	54.5481	70.6082	28.3025	30.4054	23.0552	23.7004	39.8589	30.0431	166.029	185.66	80.7134	48.2439
TRAT1	13.5847	15.9851	17.4031	816.741	2327.16	2578.36	1616.34	1427.7	448.296	1435.57	25.3875	41.1845	6.8459	13.3398	6.3191	4.27362	10.6521	29.2971	33.5915	35.5395	193.05	10.3823
TRAV12-2	13.1402	12.202	9.55536	225.378	99.3844	100.61	12.9667	85.709	9.53553	11.613	11.089	9.77632	10.6325	10.2921	10.573	8.46316	12.8715	11.688	7.5557	9.14934	11.6032	15.4726
TRAV13-1	88.7396	72.4812	40.5597	463.198	537.61	881.563	411.162	707.25	138.695	76.9947	42.452	28.3149	29.721	23.4878	37.7774	12.2576	32.4527	36.2343	66.138	35.7585	29.2624	74.9986
TRAV13-2	72.6907	67.1892	68.6619	369.279	411.162	639.804	201.532	381.334	191.406	38.5487	44.3507	55.6473	56.8554	51.0243	35.7949	39.1214	41.2166	67.136	25.9333	33.8367	55.6292	88.048
TRAV21	119.891	65.2532	125.133	439.358	417.505	765.298	157.589	463.357	2763.36	49.0813	55.8764	46.6365	51.316	42.9607	31.469	36.2384	52.0273	17.8586	79.4658	72.0601	196.235	88.25
TRAV8-6	24.5565	22.1433	18.8104	244.113	317.791	396.12	172.84	439.229	676.135	22.6665	18.3022	15.4029	34.3943	25.3093	19.1957	13.1992	24.1687	22.7654	22.7394	36.6415	23.4379	65.3932
TRAV9-2	60.4387	91.3923	39.2061	220.374	498.457	911.838	448.874	656.983	1958.9	113.995	56.1704	22.0927	47.7769	27.2867	23.5209	17.6632	27.7388	33.5472	14.885	38.638	102.812	130.918
TRBC1	575.848	930.329	525.049	8923.92	12460.7	10179.8	3287.84	16623.7	19876.2	5338.32	4520.51	2812.59	78.9432	56.8336	223.496	131.1	189.121	145.715	114.602	47.8713	551.51	181.012
TRDC	88.1785	81.155	101.067	3014.58	282.01	781.332	486.879	370.275	124.653	17980.4	10797.2	11382	61.018	30.124	22.3187	24.2665	46.642	30.4226	247.353	209.018	165.851	162.123
TREM1	415.23	236.637	211.105	102.286	116.836	67.4989	71.2657	101.484	66.5003	574.869	79.8574	95.7575	1775.19	603.886	194.725	184.65	222.637	317.785	285.398	685.707	377.959	8433.29
TREM2	17.0079	11.9955	19.3205	16.1851	14.8817	16.9301	12.7667	14.9579	101.075	14.1959	13.8047	14.6855	24.2386	2158.63	160.832	3999.02	6016.86	928.151	391.285	611.705	16.0438	24.6519
TREML2	70.5382	20.851	42.3556	23.099	50.8782	18.7834	52.4136	57.3557	59.6892	35.8793	55.0192	123.328	40.7289	27.3324	32.0205	32.6085	32.7416	27.3279	101.968	38.8856	577.253	1082.74
TRIB2	1848.22	915.324	262.804	1138.06	2278.45	2377.36	275.835	5890.34	839.93	754.156	1307.78	1049.52	123.032	152.139	71.3046	22.3637	255.21	126.818	1949.19	1394.87	311.653	155.899
TRPM4	7.69125	6.19938	63.7178	7.79676	17.9812	9.46357	9.52016	11.6232	6.76116	8.48673	7.44365	7.70255	18.3611	14.4041	248.638	237.248	28.5529	34.8833	16.8348	16.0288	22.6894	10.221
TRPM6	45.9225	35.631	64.5505	25.7672	16.8672	31.1039	63.7902	32.9238	19.9464	59.1506	22.1078	30.9959	35.6964	27.7197	22.7765	16.0454	21.8329	33.4403	20.6407	17.971	515.176	220.431
TSHR	19.8156	17.2645	95.3504	11.6465	11.3452	13.7168	7.64466	236.301	11.8908	15.2859	20.1578	12.7547	14.2934	15.6007	9.44212	7.80832	19.7987	22.629	20.5911	9.98015	17.6117	18.3843
TTC38	24.8504	25.0337	39.6473	374.209	118.004	26.4983	57.4174	172.233	43.286	427.662	2894.46	662.143	105.646	91.9991	437.361	328.982	95.2943	143.959	458.421	370.591	155.207	47.0571
TXK	309.77	195.384	85.8232	676.059	1384.39	426.315	175.384	206.763	166.368	319.037	1564.53	2015.56	62.9699	64.0096	86.8421	154.357	82.3979	85.1599	173.705	201.212	201.217	173.973
TYR	15.4917	15.243	15.0813	10.6271	44.3821	197.088	37.4502	6.81844	1778.51	304.555	71.9986	51.1786	14.068	36.3142	25.0292	31.8018	32.7314	12.3135	142.767	104.465	13.1384	150.834
UBASH3A	10.126	12.7026	8.08761	876.38	2177.79	714.94	203.078	935.01	1376.32	319.094	6.03837	8.53329	6.10514	4.993	8.79552	8.19555	4.84123	5.67717	13.698	17.9432	59.1375	10.0996
UGT1A8	680.53	471.193	163.901	82.1382	98.5201	123.328	101.446	93.5038	450.365	462.51	78.1338	85.3184	91.5068	96.134	55.5123	55.0428	85.8252	54.2469	63.8697	59.0306	97.1547	336.42
UGT2B17	29.4602	12.6982	309.882	3.97605	5.04978	5.59882	4.54161	7.81977	8.39783	10.1392	4.74327	6.48248	7.24435	6.40897	7.74816	7.39507	6.87195	9.05611	5.2485	5.64228	9.00115	8.79156
UPK3A	15.1818	14.6168	17.2585	10.9786	13.1523	13.6444	20.1847	10.9101	20.9332	16.6169	10.884	9.96124	215.872	12.1242	6.81844	7.60682	10.6016	15.1011	10.7435	15.4131	25.6275	18.5431
VILL	29.5222	34.5926	53.8649	434.224	693.166	500.122	32.8544	445.357	38.8564	209.251	215.541	39.8394	97.7812	43.0669	305.409	129.913	21.0868	20.966	102.497	138.145	23.6613	20.8841
VNN1	22.9584	21.9247	16.7111	12.2666	29.0739	11.4982	6.8817	4.55671	50.6013	119.894	62.5796	27.0878	1024.7	924.737	12.2811	120.64	158.59	37.6037	68.021	40.7536	64.4887	894.856
VNN2	64.9846	79.6811	51.0458	445.484	574.733	87.4389	7.68056	183.181	81.2513	1027.32	600.763	133.983	3300.12	462.812	6.19852	8.2558	6.33332	7.3391	242.318	17.9884	9.75316	18515.4
VNN3	30.93	32.2966	10.573	13.0786	58.3332	28.5473	26.895	36.4152	85.4262	38.7216	22.0832	44.5319	187.6	28.6518	70.9679	60.5095	19.0357	20.433	47.3606	42.1964	79.9426	2232.47
VPREB3	3778.57	2591.6	404.257	89.6956	38.116	166.122	154.182	86.9994	335.226	155.103	126.737	114.279	136.16	88.9725	156.426	111.698	91.9979	129.471	73.2632	68.4719	89.8696	157.957
WNT5B	11.751	11.1454	48.9577	10.6188	6.81844	8.39361	9.27233	17.9812	11.6469	10.984	6.09859	9.78903	15.9784	11.9378	11.1695	533.284	99.7739	132.765	23.5948	13.463	12.3888	15.9535
WNT7A	12.8602	17.5393	20.3328	101.409	230.762	87.4	46.54	100.097	51.7057	34.5707	11.0971	13.7932	56.253	20.2757	23.3413	10.3439	17.5221	28.44	21.1263	16.1428	57.1673	21.3423
ZAP70	13.7051	12.8114	13.3681	3230.54	4287.54	2667.27	772.783	7380.97	1758.63	1422.38	4781.95	1772	38.0597	18.4667	25.5569	32.5204	19.1498	26.8341	24.0841	38.3204	185.485	70.0495
ZBP1	35.8487	74.5068	450.646	149.291	184.778	162.527	27.5577	71.3046	144.076	106.925	499.948	127.042	24.5424	14.8952	16.1636	22.0927	10.5463	25.5064	13.0844	28.7034	143.711	269.619
ZBTB10	152.69	99.2242	95.5604	99.8807	109.576	91.3679	83.0639	1221.65	4.2461	179.029	122.435	106.539	62.0138	65.6592	222.308	74.0349	76.5971	773.951	117.061	216.38	144.63	20.3158
ZBTB32	9.85722	193.196	12.932	27.8351	29.1325	7.7711	187.392	24.7187	112.586	29.8173	16.3476	12.3871	10.5265	10.2853	223.024	14.982	10.5671	71.9054	11.0202	8.85202	57.765	12.2763
ZFP36L2	923.603	661.882	485.645	3227.83	357.008	3731.33	366.096	641.848	2943.24	154.935	915.016	263.104	1341.52	297.482	23.5721	303.577	532.373	124.3	34.425	54.2528	311.977	517.339
ZNF135	94.2879	16.3149	11.4028	64.5605	96.2039	15.8062	3.23618	31.1691	3.22841	42.8708	151.102	79.0466	3.86006	8.51932	4.99336	39.7571	8.27953	2.42005	24.3786	14.2318	99.1001	1.9264
ZNF165	6.42155	4.43162	74.3032	3.19069	33.6712	2.72437	45.2033	6.14721	5.92545	4.89801	7.02308	4.89763	2.66873	2.37297	4.23966	6.08024	2.41511	1.83778	4.45039	3.13941	5690.38	5.35788
ZNF204P	77.8769	42.9462	41.0751	151.96	400.663	168.895	40.0906	52.229	83.7632	129.599	37.0133	32.9746	29.9097	26.8436	33.0212	27.4613	25.5539	36.1659	38.8875	25.2067	65.4878	27.4855
ZNF222	9.80066	7.20322	11.6914	71.9113	56.6425	15.0813	15.5899	182.939	10.0278	13.8433	92.2788	91.8083	19.8606	70.8249	47.0294	148.622	86.4182	39.9183	222.574	211.494	346.556	26.8256
ZNF286A	737.86	331.909	73.882	218.227	5.59882	169.313	190.875	118.138	136.869	246.504	225.408	199.3	11.0439	13.5058	36.0387	21.8756	15.0809	280.77	77.8404	25.8333	7.47317	441.313
ZNF324	28.212	23.4644	21.1733	32.0113	348.19	27.1691	24.0558	179.586	63.4655	45.385	44.9412	42.9022	28.7144	26.2033	37.883	112.914	25.2478	23.8365	30.1963	45.7752	35.2933	35.4247
ZNF442	19.7132	22.4475	19.3916	32.1103	8.98049	9.18295	3.10304	44.7006	47.3862	180.858	21.7702	40.9524	12.3002	31.3526	71.6424	36.6123	48.3033	96.0087	79.0666	3.64616	40.2965	20.1575
